# Supplementary material for: Pollen-based reconstructions of Holocene climate trends in the eastern Mediterranean region
Source: Copernicus journal article supplement (doi:10.5194/egusphere-2023-864), 2023-05-22

## Supplementary Material

### Pollen-based reconstructions of long-term regional climate trends of the eastern Mediterranean during the Holocene

#### Contents

**Supplementary Table 1.** Allocation of pollen taxa found in samples of the Eastern Mediterranean-Black Sea Caspian Corridor (EMBSecBIO) pollen database into the 247 types represented in the SPECIAL Modern Pollen Data Set (SMPDS) (Harrison, 2019). The table indicates the taxonomic level of aggregation, the name used for the amalgamated taxon, and the component species or genera included in this taxon.

**Supplementary Table 2.** Metadata of the pollen records used in the reconstructions.

**Supplementary Table 3.** Details of the models used for the transient climate simulations.

**Supplementary Table 4.** Leave-out cross-validation fitness of fxTWA-PLSv2 for mean temperature of the coldest month (MTCO), mean temperature of the warmest month (MTWA), growing degree days above base level 0°C (GDD0) and plant-available moisture ( $\alpha$ ) with p-spline smoothed fx estimation, using bins of 0.02, 0.02 and 0.002, showing results for all the components. RMSEP is the root-mean-square error of prediction. p assesses whether using the current number of components is significantly different from using one component less; the last significant number of components is indicated in bold. The degree of overall compression is assessed by linear regression of the cross-validated reconstructions onto the climate variable, where b1 and b1.se are the slope and the standard error of the slope, respectively. The overall compression is reduced as the slope approaches 1.

**Supplementary Figure 1.** Map of distribution of the modern pollen samples the SPECIAL Modern Pollen Data Set (SMPDS) (Harrison, 2019) used to train the model.

**Supplementary Figure 2.** Distribution of Hill N2 values of the fossil pollen samples. Samples with an N2 value of <2 (indicated by the red dotted line) were excluded from the analysis.

**Supplementary Figure 3.** Impact of correcting for the direct effect of changing CO<sub>2</sub> levels following Prentice et al. (2022) on the reconstruction of  $\alpha$ . The original reconstruction is shown in green and the corrected reconstruction in red.

**Supplementary Figure 4.** Comparison of mean temperature of the coldest month (MTCO) and mean temperature of the warmest month (MTWA) in the EMBSecBIO domain from the TRACE-21K-I simulation, showing both the calendar adjusted version (green) and non-calendar adjusted version (orange), and compared to the non-calendar adjusted outputs from the TRACE-21K-II (red) simulation.

**Supplementary Figure 5.** Geopotential height, expressed as anomalies compared to present, from the LOVECLIM simulations for four key times during the Holocene: 11±0.15, 9±0.15, 6±0.15 and 3±0.15 ka.

**Supplementary Table 1.** Allocation of pollen taxa found in samples of the Eastern Mediterranean-Black Sea Caspian Corridor (EMBSecBIO) pollen database into the 247 types represented in the SPECIAL Modern Pollen Data Set (SMPDS) (Harrison, 2019). The table indicates the taxonomic level of aggregation, the name used for the amalgamated taxon, and the component species or genera included in this taxon.

| <b>Taxonomic level</b> | <b>Amalgamated taxon name</b> | <b>Individual taxa included</b>                                                                                                                                                                                                                                                                                                                                                                                                                                                                                                                                                                                                                                                                                                                                                                                                                                                                                                                                                                                                                                            |
|------------------------|-------------------------------|----------------------------------------------------------------------------------------------------------------------------------------------------------------------------------------------------------------------------------------------------------------------------------------------------------------------------------------------------------------------------------------------------------------------------------------------------------------------------------------------------------------------------------------------------------------------------------------------------------------------------------------------------------------------------------------------------------------------------------------------------------------------------------------------------------------------------------------------------------------------------------------------------------------------------------------------------------------------------------------------------------------------------------------------------------------------------|
| Genus                  | <i>Abies</i>                  | <i>Abies</i> , <i>Abies alba</i> , <i>Abies cilicica</i> , <i>Abies nordmanniana</i> , <i>Abies pinsapo subsp marocana</i>                                                                                                                                                                                                                                                                                                                                                                                                                                                                                                                                                                                                                                                                                                                                                                                                                                                                                                                                                 |
| Family                 | Acanthaceae                   | <i>Acanthus mollis</i>                                                                                                                                                                                                                                                                                                                                                                                                                                                                                                                                                                                                                                                                                                                                                                                                                                                                                                                                                                                                                                                     |
| Genus                  | <i>Acer</i>                   | <i>Acer</i> , <i>Acer campestre</i> , <i>Acer campestre</i> type, <i>Acer pseudoplatanus</i> , <i>Acer</i> type                                                                                                                                                                                                                                                                                                                                                                                                                                                                                                                                                                                                                                                                                                                                                                                                                                                                                                                                                            |
| Genus                  | <i>Aconitum</i>               | <i>Aconitum</i> , <i>Aconitum</i> group, <i>Aconitum napellus</i> type, <i>Aconitum septentrionale</i> , <i>Aconitum</i> type                                                                                                                                                                                                                                                                                                                                                                                                                                                                                                                                                                                                                                                                                                                                                                                                                                                                                                                                              |
| Family                 | Actinidiaceae                 | <i>Actinidia</i>                                                                                                                                                                                                                                                                                                                                                                                                                                                                                                                                                                                                                                                                                                                                                                                                                                                                                                                                                                                                                                                           |
| Genus                  | <i>Adonis</i>                 | <i>Adonis</i> , <i>Adonis aestivalis</i> type, <i>Adonis</i> type                                                                                                                                                                                                                                                                                                                                                                                                                                                                                                                                                                                                                                                                                                                                                                                                                                                                                                                                                                                                          |
| Family                 | Adoxaceae                     | <i>Adoxa</i> , <i>Adoxa moschatellina</i> , <i>Adoxa</i> type                                                                                                                                                                                                                                                                                                                                                                                                                                                                                                                                                                                                                                                                                                                                                                                                                                                                                                                                                                                                              |
| Genus                  | <i>Aesculus</i>               | <i>Aesculus</i> , <i>Aesculus hippocastanum</i>                                                                                                                                                                                                                                                                                                                                                                                                                                                                                                                                                                                                                                                                                                                                                                                                                                                                                                                                                                                                                            |
| Genus                  | <i>Ailanthus</i>              | <i>Ailanthus</i>                                                                                                                                                                                                                                                                                                                                                                                                                                                                                                                                                                                                                                                                                                                                                                                                                                                                                                                                                                                                                                                           |
| Family                 | Aizoaceae                     | <i>Carpobrotus</i>                                                                                                                                                                                                                                                                                                                                                                                                                                                                                                                                                                                                                                                                                                                                                                                                                                                                                                                                                                                                                                                         |
| Genus sub-group        | <i>Alnus</i>                  | <i>Alnus</i> , <i>Alnus glutinosa</i> , <i>Alnus glutinosa</i> type, <i>Alnus glutinosa/Alnus incana</i> , <i>Alnus incana</i> , <i>Alnus incana</i> type, <i>Alnus incana/Alnus cordata</i> type, <i>Alnus non-viridis</i> , <i>Alnus</i> type                                                                                                                                                                                                                                                                                                                                                                                                                                                                                                                                                                                                                                                                                                                                                                                                                            |
| Genus sub-group        | <i>Alnus alnobetula</i>       | <i>Alnus viridis</i>                                                                                                                                                                                                                                                                                                                                                                                                                                                                                                                                                                                                                                                                                                                                                                                                                                                                                                                                                                                                                                                       |
| Family                 | Amaranthaceae                 | <i>Aellenia</i> type, Amaranthaceae, <i>Amaranthus</i> , <i>Atriplex nudicaulis</i> , <i>Chenopodium</i> , <i>Chenopodium album</i> , <i>Halothamnus</i> type, <i>Noaea</i> type                                                                                                                                                                                                                                                                                                                                                                                                                                                                                                                                                                                                                                                                                                                                                                                                                                                                                           |
| Family                 | Amaryllidaceae                | Amaryllidaceae, <i>Narcissus</i>                                                                                                                                                                                                                                                                                                                                                                                                                                                                                                                                                                                                                                                                                                                                                                                                                                                                                                                                                                                                                                           |
| Family                 | Anacardiaceae                 | Anacardiaceae                                                                                                                                                                                                                                                                                                                                                                                                                                                                                                                                                                                                                                                                                                                                                                                                                                                                                                                                                                                                                                                              |
| Genus                  | <i>Andromeda</i>              | <i>Andromeda</i>                                                                                                                                                                                                                                                                                                                                                                                                                                                                                                                                                                                                                                                                                                                                                                                                                                                                                                                                                                                                                                                           |
| Family                 | Apiaceae                      | <i>Aegopodium</i> , <i>Anthriscus sylvestris</i> type, <i>Anthriscus</i> type, Apiaceae, <i>Apium</i> , <i>Apium</i> type, <i>Astrantia</i> , <i>Astrantia</i> type, <i>Athamanta cretensis</i> , <i>Berula erecta</i> type, <i>Bunium</i> type, <i>Aegopodium podagraria</i> , <i>Bupleurum</i> , <i>Bupleurum</i> type, <i>Carum carvi</i> , <i>Chaerophyllum</i> , <i>Chaerophyllum hirsutum</i> type, <i>Chaerophyllum</i> type, <i>Conopodium</i> , <i>Conopodium majus</i> , <i>Daucaceae</i> , <i>Daucus carota</i> , <i>Ammi</i> type, <i>Daucus carota</i> type, <i>Daucus</i> type, <i>Echinophora</i> , <i>Eryngium</i> , <i>Eryngium ilicifolium</i> , <i>Eryngium</i> type, <i>Falcaria</i> type, <i>Ferula</i> , <i>Ferula</i> type, <i>Heracleum</i> , <i>Angelica</i> , <i>Heracleum laciniatum</i> type, <i>Heracleum sphondylium</i> , <i>Heracleum</i> type, <i>Laserpitium latifolium</i> type, <i>Laserpitium prutenicum</i> , <i>Ligusticum mutellina</i> , <i>Malabaila</i> , <i>Meum</i> , <i>Meum athamanticum</i> , <i>Neogaya simplex</i> type, |

|                  |                              |                                                                                                                                                                                                                                                                                                                                                                                                                                                                                                                                                                                                                                                                                                                                                                                                                                                                                                                                                                                                                                                                                                                                                                                                                                                                                                                     |
|------------------|------------------------------|---------------------------------------------------------------------------------------------------------------------------------------------------------------------------------------------------------------------------------------------------------------------------------------------------------------------------------------------------------------------------------------------------------------------------------------------------------------------------------------------------------------------------------------------------------------------------------------------------------------------------------------------------------------------------------------------------------------------------------------------------------------------------------------------------------------------------------------------------------------------------------------------------------------------------------------------------------------------------------------------------------------------------------------------------------------------------------------------------------------------------------------------------------------------------------------------------------------------------------------------------------------------------------------------------------------------|
|                  |                              | <i>Angelica archangelica</i> , <i>Oenanthe</i> , <i>Oenanthe</i> type, <i>Orlaya</i> , <i>Orlaya grandiflora</i> , <i>Pastinaca</i> type, <i>Peucedanum</i> , <i>Peucedanum ostruthium</i> , <i>Peucedanum</i> type, <i>Pimpinella</i> , <i>Pimpinella major</i> type, <i>Angelica</i> type, <i>Pimpinella</i> type, <i>Pleurospermum austriacum</i> , <i>Sanicula</i> , <i>Sanicula europaea</i> , <i>Sanicula</i> type, <i>Scandix</i> , <i>Seseli</i> type, <i>Torilis</i> , <i>Torilis arvensis</i> , <i>Turgenia</i> type, <i>Anisosciadium</i> type, <i>Anthriscus</i> , <i>Anthriscus sylvestris</i>                                                                                                                                                                                                                                                                                                                                                                                                                                                                                                                                                                                                                                                                                                         |
| Genus            | <i>Aquilegia</i>             | <i>Aquilegia</i> type                                                                                                                                                                                                                                                                                                                                                                                                                                                                                                                                                                                                                                                                                                                                                                                                                                                                                                                                                                                                                                                                                                                                                                                                                                                                                               |
| Family           | Araceae                      | Araceae                                                                                                                                                                                                                                                                                                                                                                                                                                                                                                                                                                                                                                                                                                                                                                                                                                                                                                                                                                                                                                                                                                                                                                                                                                                                                                             |
| Genus            | <i>Arbutus</i>               | <i>Arbutus</i> , <i>Arbutus</i> type, <i>Arbutus unedo</i>                                                                                                                                                                                                                                                                                                                                                                                                                                                                                                                                                                                                                                                                                                                                                                                                                                                                                                                                                                                                                                                                                                                                                                                                                                                          |
| Genus            | <i>Arctostaphylos</i>        | <i>Arctostaphylos</i> , <i>Arctostaphylos uva-ursi</i>                                                                                                                                                                                                                                                                                                                                                                                                                                                                                                                                                                                                                                                                                                                                                                                                                                                                                                                                                                                                                                                                                                                                                                                                                                                              |
| Genus            | <i>Argania</i>               | <i>Argania spinosa</i>                                                                                                                                                                                                                                                                                                                                                                                                                                                                                                                                                                                                                                                                                                                                                                                                                                                                                                                                                                                                                                                                                                                                                                                                                                                                                              |
| Family           | Aristolochiaceae             | <i>Aristolochia</i>                                                                                                                                                                                                                                                                                                                                                                                                                                                                                                                                                                                                                                                                                                                                                                                                                                                                                                                                                                                                                                                                                                                                                                                                                                                                                                 |
| Genus            | <i>Artemisia</i>             | <i>Artemisia</i> , <i>Artemisia genipii</i> / <i>Artemisia mutellina</i> , <i>Artemisia herba-alba</i> type, <i>Artemisia</i> type, <i>Artemisia vulgaris</i> type                                                                                                                                                                                                                                                                                                                                                                                                                                                                                                                                                                                                                                                                                                                                                                                                                                                                                                                                                                                                                                                                                                                                                  |
| Family           | Asclepiadaceae               | Asclepiadaceae                                                                                                                                                                                                                                                                                                                                                                                                                                                                                                                                                                                                                                                                                                                                                                                                                                                                                                                                                                                                                                                                                                                                                                                                                                                                                                      |
| Family           | Asparagaceae                 | Asparagaceae, <i>Asparagus</i> , <i>Asparagus</i> type, <i>Convallaria</i> , <i>Convallaria</i> type, <i>Maianthemum bifolium</i> , <i>Maianthemum</i> type, <i>Ornithogalum</i> type, <i>Scilla</i> type                                                                                                                                                                                                                                                                                                                                                                                                                                                                                                                                                                                                                                                                                                                                                                                                                                                                                                                                                                                                                                                                                                           |
| Family           | Asphodelaceae                | <i>Eremurus</i>                                                                                                                                                                                                                                                                                                                                                                                                                                                                                                                                                                                                                                                                                                                                                                                                                                                                                                                                                                                                                                                                                                                                                                                                                                                                                                     |
| Family           | Asphodeliaceae               | <i>Asphodeline</i> , <i>Asphodelus</i> , <i>Asphodelus albus</i> , <i>Asphodelus albus</i> type, <i>Asphodelus fistulosus</i> type, <i>Asphodelus</i> type                                                                                                                                                                                                                                                                                                                                                                                                                                                                                                                                                                                                                                                                                                                                                                                                                                                                                                                                                                                                                                                                                                                                                          |
| Family           | Asteraceae                   | Asteraceae                                                                                                                                                                                                                                                                                                                                                                                                                                                                                                                                                                                                                                                                                                                                                                                                                                                                                                                                                                                                                                                                                                                                                                                                                                                                                                          |
| Family sub-group | Asteraceae (Liguliflorae)    | Asteraceae (Liguliflorae)                                                                                                                                                                                                                                                                                                                                                                                                                                                                                                                                                                                                                                                                                                                                                                                                                                                                                                                                                                                                                                                                                                                                                                                                                                                                                           |
| Family sub-group | Asteroideae                  | <i>Achillea</i> , <i>Antennaria</i> , <i>Antennaria</i> type, <i>Anthemis</i> , <i>Anthemis</i> type, <i>Arnica montana</i> , <i>Aster</i> , <i>Aster bellidiastrum</i> , <i>Aster</i> type, <i>Aster/Achillea</i> , <i>Aster/Achillea</i> type, <i>Achillea</i> type, Asteraceae (Tubuliflorae), Asteroideae, <i>Bellis</i> , <i>Bellis</i> type, <i>Bidens</i> , <i>Bidens</i> type, <i>Calendula</i> , <i>Calendula</i> type, <i>Chrysanthemum alpinum</i> , <i>Doronicum</i> , <i>Achillea/Anthemis</i> type, <i>Erigeron</i> , <i>Eupatorium</i> , <i>Eupatorium</i> type, <i>Filago</i> type, <i>Filifolium sibiricum</i> , <i>Gnaphalium</i> , <i>Gnaphalium</i> type, <i>Helianthus</i> , <i>Helianthus</i> type, <i>Homogyne</i> , <i>Achillea/Aster</i> , <i>Homogyne alpina</i> , <i>Inula</i> , <i>Inula</i> type, <i>Logfia</i> type, <i>Matricaria</i> type, <i>Petasites</i> , <i>Petasites</i> type, <i>Senecio</i> , <i>Senecio</i> type, <i>Solidago</i> , <i>Adenostyles</i> type, <i>Solidago</i> type, <i>Solidago virgaurea</i> type, <i>Tussilago farfara</i> , <i>Tussilago</i> type, <i>Xanthium</i> , <i>Xanthium spinosum</i> , <i>Xanthium strumarium</i> , <i>Xanthium</i> type, <i>Ambrosia</i> , <i>Ambrosia artemisiifolia</i> type, <i>Ambrosia</i> type, <i>Ambrosia/Xanthium</i> |
| Genus            | <i>Astragalus</i>            | <i>Astragalus</i> , <i>Astragalus alpinus</i> type, <i>Astragalus</i> type                                                                                                                                                                                                                                                                                                                                                                                                                                                                                                                                                                                                                                                                                                                                                                                                                                                                                                                                                                                                                                                                                                                                                                                                                                          |
| Family           | Berberidaceae                | Berberidaceae                                                                                                                                                                                                                                                                                                                                                                                                                                                                                                                                                                                                                                                                                                                                                                                                                                                                                                                                                                                                                                                                                                                                                                                                                                                                                                       |
| Genus            | <i>Berberis</i>              | <i>Berberis</i> , <i>Berberis vulgaris</i> , <i>Mahonia</i>                                                                                                                                                                                                                                                                                                                                                                                                                                                                                                                                                                                                                                                                                                                                                                                                                                                                                                                                                                                                                                                                                                                                                                                                                                                         |
| Genus            | <i>Betula</i>                | <i>Betula</i> , <i>Betula</i> type, <i>Betula alba</i> , <i>Betula alba</i> type, <i>Betula pendula</i> , <i>Betula pendula/Betula pubescens</i> , <i>Betula pubescens</i> , <i>Betula pubescens</i> type, <i>Betula</i> sect. <i>Albae</i> , <i>Betula tortuosa</i>                                                                                                                                                                                                                                                                                                                                                                                                                                                                                                                                                                                                                                                                                                                                                                                                                                                                                                                                                                                                                                                |
| Genus            | <i>Betula (Chamaebetula)</i> | <i>Betula fruticosa</i> , <i>Betula humilis/Betula nana</i> , <i>Betula nana</i> , <i>Betula nana</i> type                                                                                                                                                                                                                                                                                                                                                                                                                                                                                                                                                                                                                                                                                                                                                                                                                                                                                                                                                                                                                                                                                                                                                                                                          |
| Family           | Boraginaceae                 | <i>Alkanna</i> , <i>Cynoglossum creticum</i> , <i>Echium</i> , <i>Echium</i> type, <i>Echium vulgare</i> , <i>Heliotropium</i> type, <i>Lithospermum</i> , <i>Myosotis</i> , <i>Myosotis arvensis</i> type, <i>Myosotis</i> type, <i>Onosma</i> , <i>Anchusa</i> , <i>Pulmonaria</i> , <i>Pulmonaria</i> type, <i>Symphytum</i> , <i>Symphytum</i> type, <i>Anchusa arvensis</i> , <i>Anchusa</i> type, Boraginaceae, <i>Borago officinalis</i> , <i>Cerinth</i> , <i>Cerinth minor</i> , <i>Cerinth</i> type                                                                                                                                                                                                                                                                                                                                                                                                                                                                                                                                                                                                                                                                                                                                                                                                       |

|        |                                   |                                                                                                                                                                                                                                                                                                                                                                                                                                                                                                                                                                                                                                                                                                                                                                                                                                                                                                                                                                                                                                                                                                                                                                                                                                                                                                                                                                                                                                                                                                                                                                                                                                                                                                                                                                                                                                                                                            |
|--------|-----------------------------------|--------------------------------------------------------------------------------------------------------------------------------------------------------------------------------------------------------------------------------------------------------------------------------------------------------------------------------------------------------------------------------------------------------------------------------------------------------------------------------------------------------------------------------------------------------------------------------------------------------------------------------------------------------------------------------------------------------------------------------------------------------------------------------------------------------------------------------------------------------------------------------------------------------------------------------------------------------------------------------------------------------------------------------------------------------------------------------------------------------------------------------------------------------------------------------------------------------------------------------------------------------------------------------------------------------------------------------------------------------------------------------------------------------------------------------------------------------------------------------------------------------------------------------------------------------------------------------------------------------------------------------------------------------------------------------------------------------------------------------------------------------------------------------------------------------------------------------------------------------------------------------------------|
| Family | Brassicaceae                      | <i>Arabidopsis</i> , <i>Cardamine pratensis</i> type, <i>Cardamine</i> type, <i>Crambe</i> , <i>Descurainia</i> , <i>Draba</i> , <i>Draba</i> type, <i>Hornungia</i> type, <i>Lepidium</i> type, <i>Matthiola</i> , <i>Sinapis</i> , <i>Barbarea</i> type, <i>Sinapis</i> type, <i>Brassica</i> , <i>Brassica</i> type, Brassicaceae, Brassicaceae type, <i>Capsella bursa-pastoris</i> type, <i>Capsella</i> type, <i>Cardamine</i>                                                                                                                                                                                                                                                                                                                                                                                                                                                                                                                                                                                                                                                                                                                                                                                                                                                                                                                                                                                                                                                                                                                                                                                                                                                                                                                                                                                                                                                       |
| Genus  | <i>Bruckenthalia</i>              | <i>Bruckenthalia</i>                                                                                                                                                                                                                                                                                                                                                                                                                                                                                                                                                                                                                                                                                                                                                                                                                                                                                                                                                                                                                                                                                                                                                                                                                                                                                                                                                                                                                                                                                                                                                                                                                                                                                                                                                                                                                                                                       |
| Genus  | <i>Buxus</i>                      | <i>Buxus</i> , <i>Buxus sempervirens</i>                                                                                                                                                                                                                                                                                                                                                                                                                                                                                                                                                                                                                                                                                                                                                                                                                                                                                                                                                                                                                                                                                                                                                                                                                                                                                                                                                                                                                                                                                                                                                                                                                                                                                                                                                                                                                                                   |
| Genus  | <i>Calluna</i>                    | <i>Calluna</i> , <i>Calluna</i> type, <i>Calluna vulgaris</i> , <i>Calluna vulgaris</i> type                                                                                                                                                                                                                                                                                                                                                                                                                                                                                                                                                                                                                                                                                                                                                                                                                                                                                                                                                                                                                                                                                                                                                                                                                                                                                                                                                                                                                                                                                                                                                                                                                                                                                                                                                                                               |
| Family | Campanulaceae                     | <i>Campanula</i> , <i>Phyteuma</i> , <i>Phyteuma</i> type, <i>Campanula</i> type, Campanulaceae, <i>Jasione</i> , <i>Jasione montana</i> , <i>Jasione</i> type, <i>Legousia</i> , <i>Lobelia dortmanna</i> , <i>Lobelia</i> type                                                                                                                                                                                                                                                                                                                                                                                                                                                                                                                                                                                                                                                                                                                                                                                                                                                                                                                                                                                                                                                                                                                                                                                                                                                                                                                                                                                                                                                                                                                                                                                                                                                           |
| Family | Capparaceae                       | Capparidaceae, <i>Capparis</i> , <i>Capparis spinosa</i> , <i>Capparis</i> type                                                                                                                                                                                                                                                                                                                                                                                                                                                                                                                                                                                                                                                                                                                                                                                                                                                                                                                                                                                                                                                                                                                                                                                                                                                                                                                                                                                                                                                                                                                                                                                                                                                                                                                                                                                                            |
| Family | Caprifoliaceae                    | Caprifoliaceae, <i>Scabiosa columbaria</i> type, <i>Scabiosa rotata</i> type, <i>Scabiosa</i> type, <i>Scabiosa/Succisa</i> type, <i>Succisa</i> , <i>Succisa pratensis</i> , <i>Succisa pratensis</i> type, <i>Succisa</i> type, <i>Dipsacaceae</i> , <i>Dipsacus</i> , <i>Dipsacus fullonum</i> type, <i>Dipsacus</i> type, <i>Knautia</i> , <i>Knautia arvensis</i> , <i>Knautia</i> type, <i>Scabiosa</i>                                                                                                                                                                                                                                                                                                                                                                                                                                                                                                                                                                                                                                                                                                                                                                                                                                                                                                                                                                                                                                                                                                                                                                                                                                                                                                                                                                                                                                                                              |
| Genus  | <i>Carduoideae</i>                | <i>Arctium</i> , <i>Centaurea</i> , <i>Centaurea collina</i> , <i>Centaurea collina</i> type, <i>Centaurea cyanus</i> , <i>Centaurea cyanus</i> type, <i>Centaurea depressa</i> type, <i>Centaurea jacea</i> , <i>Centaurea jacea</i> type, <i>Centaurea montana</i> , <i>Centaurea montana</i> type, <i>Arctium</i> type, <i>Centaurea nigra</i> , <i>Centaurea nigra</i> type, <i>Centaurea rhenana</i> type, <i>Centaurea scabiosa</i> , <i>Centaurea scabiosa</i> type, <i>Centaurea solstitialis</i> , <i>Centaurea solstitialis</i> type, <i>Centaurea</i> type, <i>Cirsium</i> , <i>Cirsium</i> type, <i>Arctium/Jurinea</i> , <i>Cirsium/Carduus</i> , <i>Cirsium/Gundelia</i> , <i>Cousinia</i> , <i>Echinops</i> , <i>Gundelia</i> type, <i>Jurinea</i> type, <i>Onopordum</i> , <i>Onopordum</i> type, <i>Saussurea</i> , <i>Saussurea alpina</i> , <i>Carduoideae</i> , <i>Saussurea</i> type, <i>Serratula</i> , <i>Serratula</i> type, <i>Carduus</i> , <i>Carduus</i> type, <i>Carlina</i> , <i>Carlina</i> type, <i>Carthamus</i>                                                                                                                                                                                                                                                                                                                                                                                                                                                                                                                                                                                                                                                                                                                                                                                                                                          |
| Genus  | <i>Carpinus betulus</i>           | <i>Carpinus</i> , <i>Carpinus betulus</i> , <i>Carpinus betulus</i> type, <i>Carpinus</i> type                                                                                                                                                                                                                                                                                                                                                                                                                                                                                                                                                                                                                                                                                                                                                                                                                                                                                                                                                                                                                                                                                                                                                                                                                                                                                                                                                                                                                                                                                                                                                                                                                                                                                                                                                                                             |
| Genus  | <i>Carpinus orientalis/Ostrya</i> | <i>Carpinus orientalis</i> , <i>Carpinus orientalis</i> type, <i>Carpinus orientalis/Ostrya</i> , <i>Carpinus orientalis/Ostrya carpinifolia</i> , <i>Carpinus orientalis/Ostrya carpinifolia</i> type, <i>Carpinus/Ostrya</i> , <i>Carpinus/Ostrya</i> type, <i>Ostrya</i> , <i>Ostrya</i> type                                                                                                                                                                                                                                                                                                                                                                                                                                                                                                                                                                                                                                                                                                                                                                                                                                                                                                                                                                                                                                                                                                                                                                                                                                                                                                                                                                                                                                                                                                                                                                                           |
| Family | Caryophyllaceae                   | <i>Agrostemma githago</i> , <i>Cerastium cerastioides</i> type, <i>Cerastium fontanum</i> type, <i>Cerastium</i> type, <i>Cerastium/Stellaria</i> type, <i>Corrigiola</i> , <i>Dianthus</i> , <i>Dianthus superbus</i> type, <i>Dianthus</i> type, <i>Frankenia</i> , <i>Frankenia</i> type, <i>Agrostemma</i> type, <i>Gypsophila</i> , <i>Gypsophila fastigiata</i> , <i>Gypsophila repens</i> type, <i>Gypsophila</i> type, <i>Herniaria</i> , <i>Herniaria glabra</i> , <i>Herniaria</i> type, <i>Herniaria/Paronychia</i> , <i>Illecebrum</i> , <i>Loeflingia</i> , <i>Arenaria</i> , <i>Lychnis</i> , <i>Lychnis flos-cuculi</i> , <i>Lychnis flos-cuculi</i> type, <i>Lychnis</i> type, <i>Lychnis viscaria</i> type, <i>Minuartia</i> , <i>Minuartia rubra</i> type, <i>Minuartia</i> type, <i>Minuartia verna</i> type, <i>Moehringia</i> type, <i>Arenaria</i> type, <i>Paronychia</i> , <i>Paronychia</i> type, <i>Polycarpon</i> , <i>Sagina</i> , <i>Sagina procumbens</i> , <i>Sagina</i> type, <i>Saponaria</i> , <i>Scleranthus</i> , <i>Scleranthus annuus</i> , <i>Scleranthus perennis</i> , <i>Caryophyllaceae</i> , <i>Scleranthus</i> type, <i>Silenaceae</i> , <i>Silene</i> , <i>Silene acaulis</i> , <i>Silene acaulis</i> type, <i>Silene alba</i> type, <i>Silene dioica</i> type, <i>Silene latifolia</i> , <i>Silene rupestris</i> , <i>Silene</i> type, <i>Caryophyllaceae</i> subfam. <i>Silenoideae</i> , <i>Silene vulgaris</i> type, <i>Spergula</i> , <i>Spergula arvensis</i> , <i>Spergula</i> type, <i>Spergularia</i> , <i>Spergularia</i> type, <i>Stellaria</i> , <i>Stellaria holostea</i> , <i>Stellaria holostea</i> type, <i>Stellaria nemorum</i> , <i>Cerastium</i> , <i>Stellaria nemorum</i> type, <i>Stellaria palustris</i> , <i>Stellaria</i> type, <i>Vaccaria</i> type, <i>Cerastium alpinum</i> type, <i>Cerastium arvense</i> type |
| Genus  | <i>Cassiope</i>                   | <i>Cassiope</i> , <i>Cassiope</i> type                                                                                                                                                                                                                                                                                                                                                                                                                                                                                                                                                                                                                                                                                                                                                                                                                                                                                                                                                                                                                                                                                                                                                                                                                                                                                                                                                                                                                                                                                                                                                                                                                                                                                                                                                                                                                                                     |
| Genus  | <i>Castanea</i>                   | <i>Castanea</i> , <i>Castanea sativa</i>                                                                                                                                                                                                                                                                                                                                                                                                                                                                                                                                                                                                                                                                                                                                                                                                                                                                                                                                                                                                                                                                                                                                                                                                                                                                                                                                                                                                                                                                                                                                                                                                                                                                                                                                                                                                                                                   |

|        |                      |                                                                                                                                                                                                                                                                                                                                                                                                                                                                                                                                                                   |
|--------|----------------------|-------------------------------------------------------------------------------------------------------------------------------------------------------------------------------------------------------------------------------------------------------------------------------------------------------------------------------------------------------------------------------------------------------------------------------------------------------------------------------------------------------------------------------------------------------------------|
| Genus  | <i>Cedrus</i>        | <i>Cedrus</i> , <i>Cedrus atlantica</i> , <i>Cedrus atlantica</i> type, <i>Cedrus libani</i>                                                                                                                                                                                                                                                                                                                                                                                                                                                                      |
| Family | Celastraceae         | Celastraceae, <i>Parnassia</i> , <i>Parnassia palustris</i>                                                                                                                                                                                                                                                                                                                                                                                                                                                                                                       |
| Genus  | <i>Celtis</i>        | <i>Celtis</i> , <i>Celtis australis</i>                                                                                                                                                                                                                                                                                                                                                                                                                                                                                                                           |
| Genus  | <i>Ceratonia</i>     | <i>Ceratonia</i> , <i>Ceratonia siliqua</i> , <i>Ceratonia</i> type                                                                                                                                                                                                                                                                                                                                                                                                                                                                                               |
| Genus  | <i>Cercis</i>        | <i>Cercis siliquastrum</i>                                                                                                                                                                                                                                                                                                                                                                                                                                                                                                                                        |
| Genus  | <i>Chamaedaphne</i>  | <i>Chamaedaphne</i> , <i>Chamaedaphne calyculata</i>                                                                                                                                                                                                                                                                                                                                                                                                                                                                                                              |
| Genus  | <i>Chamaerops</i>    | <i>Chamaerops</i>                                                                                                                                                                                                                                                                                                                                                                                                                                                                                                                                                 |
| Genus  | <i>Chimaphila</i>    | <i>Chimaphila umbellata</i>                                                                                                                                                                                                                                                                                                                                                                                                                                                                                                                                       |
| Genus  | <i>Cichorioideae</i> | <i>Cichorioideae</i> , <i>Lactuca sativa</i> type, <i>Lactuca</i> type, <i>Leontodon helveticus</i> , <i>Leontodon</i> type, <i>Scorzonera humilis</i> type, <i>Scorzonera</i> type, <i>Sonchus</i> type, <i>Taraxacum</i> , <i>Taraxacum</i> type, <i>Cichorium</i> , <i>Cichorium intybus</i> type, <i>Cichorium</i> type, <i>Crepis</i> , <i>Crepis aurea</i> , <i>Crepis</i> type, <i>Hieracium</i> type, <i>Lactuca</i>                                                                                                                                      |
| Family | Cistaceae            | Cistaceae, <i>Halimium/Tuberaria</i> , <i>Tuberaria</i>                                                                                                                                                                                                                                                                                                                                                                                                                                                                                                           |
| Genus  | <i>Cistus</i>        | <i>Cistus</i> , <i>Cistus salviifolius</i> type, <i>Cistus</i> type, <i>Cistus villosus</i> type, <i>Cistus albidus</i> type, <i>Cistus incanus</i> , <i>Cistus ladanifer</i> , <i>Cistus ladanifer</i> type, <i>Cistus monspeliensis</i> type, <i>Cistus populifolius</i> type, <i>Cistus salvifolius</i> , <i>Cistus salviifolius</i>                                                                                                                                                                                                                           |
| Genus  | <i>Clematis</i>      | <i>Clematis</i> , <i>Clematis</i> type, <i>Clematis vitalba</i> type                                                                                                                                                                                                                                                                                                                                                                                                                                                                                              |
| Genus  | <i>Clethra</i>       | <i>Clethra</i>                                                                                                                                                                                                                                                                                                                                                                                                                                                                                                                                                    |
| Family | Clusiaceae           | <i>Guttiferae</i>                                                                                                                                                                                                                                                                                                                                                                                                                                                                                                                                                 |
| Family | Colchicaceae         | <i>Colchicum</i> , <i>Colchicum autumnale</i> type, <i>Colchicum</i> type, <i>Colchicum/Merendera</i> , <i>Merendera</i>                                                                                                                                                                                                                                                                                                                                                                                                                                          |
| Genus  | <i>Colutea</i>       | <i>Colutea</i>                                                                                                                                                                                                                                                                                                                                                                                                                                                                                                                                                    |
| Family | Convolvulaceae       | <i>Calystegia</i> , <i>Calystegia sepium</i> , Convolvulaceae, <i>Convolvulus</i> , <i>Convolvulus arvensis</i> , <i>Convolvulus arvensis</i> type, <i>Corema album</i> type, <i>Cuscuta</i> , <i>Cuscuta europaea</i> type                                                                                                                                                                                                                                                                                                                                       |
| Genus  | <i>Coriaria</i>      | <i>Coriaria</i> , <i>Coriaria myrtifolia</i>                                                                                                                                                                                                                                                                                                                                                                                                                                                                                                                      |
| Genus  | <i>Cornus</i>        | Cornaceae, <i>Cornus</i> , <i>Cornus mas</i> , <i>Cornus mas/Cornus suecica</i> , <i>Cornus sanguinea</i> , <i>Cornus suecica</i>                                                                                                                                                                                                                                                                                                                                                                                                                                 |
| Genus  | <i>Corylus</i>       | <i>Corylus</i> , <i>Corylus avellana</i> , <i>Corylus avellana</i> type, <i>Corylus maxima</i> , <i>Corylus</i> type                                                                                                                                                                                                                                                                                                                                                                                                                                              |
| Genus  | <i>Cotinus</i>       | <i>Cotinus</i> , <i>Cotinus coggygria</i>                                                                                                                                                                                                                                                                                                                                                                                                                                                                                                                         |
| Genus  | <i>Cotoneaster</i>   | <i>Cotoneaster</i>                                                                                                                                                                                                                                                                                                                                                                                                                                                                                                                                                |
| Family | Crassulaceae         | <i>Crassula</i> , Crassulaceae, <i>Sedum</i> , <i>Sedum rosea</i> , <i>Sedum</i> type, <i>Sempervivum</i> , <i>Umbilicus</i> , <i>Umbilicus rupestris</i> type                                                                                                                                                                                                                                                                                                                                                                                                    |
| Genus  | <i>Crataegus</i>     | <i>Crataegus</i> , <i>Crataegus</i> type                                                                                                                                                                                                                                                                                                                                                                                                                                                                                                                          |
| Family | Cucurbitaceae        | Cucurbitaceae                                                                                                                                                                                                                                                                                                                                                                                                                                                                                                                                                     |
| Family | Cupressaceae         | Cupressaceae, <i>Taxodiaceae</i> , <i>Taxodium</i> , <i>Cupressus</i> , <i>Cupressus</i> type, <i>Juniperus</i> , <i>Juniperus communis</i> , <i>Juniperus communis</i> type, <i>Juniperus excelsa/Juniperus oxycedrus</i> , <i>Juniperus sabina</i> , <i>Juniperus</i> type                                                                                                                                                                                                                                                                                      |
| Genus  | <i>Cynomorium</i>    | <i>Cynomorium</i>                                                                                                                                                                                                                                                                                                                                                                                                                                                                                                                                                 |
| Family | Cyperaceae           | <i>Carex</i> , <i>Fimbristylis</i> , <i>Rhynchospora</i> , <i>Rhynchospora alba</i> , <i>Rhynchospora</i> type, <i>Schoenoplectus</i> , <i>Schoenoplectus lacustris</i> ssp <i>lacustris</i> , <i>Schoenoplectus</i> type, <i>Schoenus</i> type, <i>Scirpus</i> , <i>Scirpus lacustris</i> type, <i>Carex hirta</i> type, <i>Scirpus</i> type, <i>Trichophorum caespitosum</i> , <i>Carex</i> type, Cyperaceae, <i>Cyperus</i> , <i>Cyperus</i> type, <i>Eleocharis palustris</i> , <i>Eriophorum angustifolium/Eriophorum vaginatum</i> , <i>Eriophorum</i> type |
| Family | Cytinaceae           | <i>Cytinus hypocistis</i> type                                                                                                                                                                                                                                                                                                                                                                                                                                                                                                                                    |

|        |                   |                                                                                                                                                                                                                                                                                                                                                                                                                                                                                                                                                                                                                                                                                                                                                                                                                                                                                                                                                                                                                                                        |
|--------|-------------------|--------------------------------------------------------------------------------------------------------------------------------------------------------------------------------------------------------------------------------------------------------------------------------------------------------------------------------------------------------------------------------------------------------------------------------------------------------------------------------------------------------------------------------------------------------------------------------------------------------------------------------------------------------------------------------------------------------------------------------------------------------------------------------------------------------------------------------------------------------------------------------------------------------------------------------------------------------------------------------------------------------------------------------------------------------|
| Genus  | <i>Daphne</i>     | <i>Daphne</i> , <i>Daphne gnidium</i> , <i>Daphne gnidium</i> type, <i>Daphne</i> type                                                                                                                                                                                                                                                                                                                                                                                                                                                                                                                                                                                                                                                                                                                                                                                                                                                                                                                                                                 |
| Genus  | <i>Datisca</i>    | <i>Datisca</i>                                                                                                                                                                                                                                                                                                                                                                                                                                                                                                                                                                                                                                                                                                                                                                                                                                                                                                                                                                                                                                         |
| Genus  | <i>Delphinium</i> | <i>Delphinium</i> type                                                                                                                                                                                                                                                                                                                                                                                                                                                                                                                                                                                                                                                                                                                                                                                                                                                                                                                                                                                                                                 |
| Family | Dennstaedtiaceae  | <i>Pteridium</i> , <i>Pteridium aquilinum</i> , <i>Pteridium aquilinum</i> type, <i>Pteridium</i> type                                                                                                                                                                                                                                                                                                                                                                                                                                                                                                                                                                                                                                                                                                                                                                                                                                                                                                                                                 |
| Genus  | <i>Diapensia</i>  | <i>Diapensia</i> , <i>Diapensia lapponica</i>                                                                                                                                                                                                                                                                                                                                                                                                                                                                                                                                                                                                                                                                                                                                                                                                                                                                                                                                                                                                          |
| Genus  | <i>Dryas</i>      | <i>Dryas</i> , <i>Dryas octopetala</i>                                                                                                                                                                                                                                                                                                                                                                                                                                                                                                                                                                                                                                                                                                                                                                                                                                                                                                                                                                                                                 |
| Genus  | <i>Elaeagnus</i>  | <i>Elaeagnus</i>                                                                                                                                                                                                                                                                                                                                                                                                                                                                                                                                                                                                                                                                                                                                                                                                                                                                                                                                                                                                                                       |
| Genus  | <i>Empetrum</i>   | <i>Empetrum</i> , <i>Empetrum nigrum</i> , <i>Empetrum</i> type                                                                                                                                                                                                                                                                                                                                                                                                                                                                                                                                                                                                                                                                                                                                                                                                                                                                                                                                                                                        |
| Genus  | <i>Ephedra</i>    | <i>Ephedra</i> , <i>Ephedra major</i> type, <i>Ephedra</i> type, <i>Ephedra alata</i> type, <i>Ephedra distachya</i> , <i>Ephedra distachya</i> type, <i>Ephedra fragilis</i> , <i>Ephedra fragilis</i> ssp <i>campylopoda</i> , <i>Ephedra fragilis</i> type, <i>Ephedra fragilis</i> var <i>campylopoda</i> , <i>Ephedra major</i>                                                                                                                                                                                                                                                                                                                                                                                                                                                                                                                                                                                                                                                                                                                   |
| Genus  | <i>Equisetum</i>  | <i>Equisetum</i>                                                                                                                                                                                                                                                                                                                                                                                                                                                                                                                                                                                                                                                                                                                                                                                                                                                                                                                                                                                                                                       |
| Genus  | <i>Erica</i>      | <i>Erica</i> , <i>Erica lusitanica</i> type, <i>Erica scoparia</i> type, <i>Erica tetralix</i> , <i>Erica tetralix</i> type, <i>Erica</i> type, <i>Erica umbellata</i> type, <i>Erica arborea</i> , <i>Erica arborea</i> type, <i>Erica australis</i> , <i>Erica australis</i> type, <i>Erica cinerea</i> , <i>Erica cinerea</i> type, <i>Erica erigena</i> type, <i>Erica lusitanica</i>                                                                                                                                                                                                                                                                                                                                                                                                                                                                                                                                                                                                                                                              |
| Family | Ericaceae         | Ericaceae, <i>Ericales</i> , <i>Lecythis</i> , <i>Moneses</i> , <i>Orthilia</i> , <i>Phyllodoce</i> , <i>Pyrola</i>                                                                                                                                                                                                                                                                                                                                                                                                                                                                                                                                                                                                                                                                                                                                                                                                                                                                                                                                    |
| Genus  | <i>Euonymus</i>   | <i>Euonymus</i> , <i>Euonymus europaeus</i>                                                                                                                                                                                                                                                                                                                                                                                                                                                                                                                                                                                                                                                                                                                                                                                                                                                                                                                                                                                                            |
| Family | Euphorbiaceae     | <i>Acalypha</i> , <i>Euphorbia</i> , <i>Euphorbia</i> type, Euphorbiaceae                                                                                                                                                                                                                                                                                                                                                                                                                                                                                                                                                                                                                                                                                                                                                                                                                                                                                                                                                                              |
| Family | Fabaceae          | Fabaceae, <i>Glycine</i>                                                                                                                                                                                                                                                                                                                                                                                                                                                                                                                                                                                                                                                                                                                                                                                                                                                                                                                                                                                                                               |
| Family | Fabaceae (herbs)  | <i>Anthyllis</i> , <i>Lathyrus/Vicia</i> , <i>Lotus</i> , <i>Lotus corniculatus</i> , <i>Lotus corniculatus</i> type, <i>Lotus</i> type, <i>Lotus uliginosus</i> , <i>Medicago</i> , <i>Medicago littoralis</i> type, <i>Medicago sativa</i> , <i>Medicago</i> type, <i>Coronilla</i> , <i>Melilotus</i> , <i>Melilotus</i> type, <i>Onobrychis</i> , <i>Onobrychis</i> type, <i>Oxytropis</i> , <i>Phaseolus</i> type, <i>Trifolium</i> , <i>Trifolium alpinum</i> type, <i>Trifolium badium</i> type, <i>Trifolium montanum</i> , <i>Ebenus/Hedysarum</i> , <i>Trifolium pratense</i> , <i>Trifolium pratense</i> type, <i>Trifolium repens</i> , <i>Trifolium repens</i> type, <i>Trifolium spadiceum</i> type, <i>Trifolium</i> type, <i>Vicia</i> , <i>Vicia cracca</i> , <i>Vicia cracca</i> type, <i>Vicia faba</i> type, <i>Hedysarum hedysaroides</i> , <i>Vicia sylvatica</i> type, <i>Vicia</i> type, <i>Viciaceae</i> , <i>Hippocrepis comosa</i> , <i>Hippocrepis</i> type, <i>Lathyrus</i> , <i>Lathyrus</i> type, <i>Lathyrus/Vicia</i> |
| Genus  | <i>Fagus</i>      | <i>Fagus</i> , <i>Fagus orientalis</i> , <i>Fagus sylvatica</i>                                                                                                                                                                                                                                                                                                                                                                                                                                                                                                                                                                                                                                                                                                                                                                                                                                                                                                                                                                                        |
| Genus  | <i>Ficus</i>      | <i>Ficus</i> , <i>Ficus carica</i>                                                                                                                                                                                                                                                                                                                                                                                                                                                                                                                                                                                                                                                                                                                                                                                                                                                                                                                                                                                                                     |
| Genus  | <i>Flueggea</i>   | <i>Securinega tinctoria</i> type                                                                                                                                                                                                                                                                                                                                                                                                                                                                                                                                                                                                                                                                                                                                                                                                                                                                                                                                                                                                                       |
| Genus  | <i>Frangula</i>   | <i>Frangula</i> , <i>Frangula alnus</i>                                                                                                                                                                                                                                                                                                                                                                                                                                                                                                                                                                                                                                                                                                                                                                                                                                                                                                                                                                                                                |
| Genus  | <i>Fraxinus</i>   | <i>Fraxinus</i> , <i>Fraxinus angustifolia</i> , <i>Fraxinus angustifolia</i> subsp. <i>oxycarpa</i> , <i>Fraxinus angustifolia</i> type, <i>Fraxinus excelsior</i> , <i>Fraxinus excelsior</i> type, <i>Fraxinus ornus</i> , <i>Fraxinus ornus</i> type, <i>Fraxinus oxycarpa</i> type                                                                                                                                                                                                                                                                                                                                                                                                                                                                                                                                                                                                                                                                                                                                                                |
| Genus  | <i>Genisteae</i>  | <i>Cytisus</i> type, <i>Ulex</i> , <i>Ulex</i> type, <i>Cytisus/Genista</i> , <i>Cytisus/Genista</i> type, <i>Cytisus/Ulex</i> , <i>Genista</i> , <i>Genista</i> type, <i>Genista/Ulex</i> , <i>Sarothamnus scoparius</i> , <i>Spartium</i>                                                                                                                                                                                                                                                                                                                                                                                                                                                                                                                                                                                                                                                                                                                                                                                                            |
| Family | Gentianaceae      | <i>Centaurium</i> , <i>Gentiana purpurea</i> type, Gentianaceae, <i>Gentianella</i> , <i>Gentianella campestris</i> type, <i>Swertia perennis</i> , <i>Centaurium maritimum</i> , <i>Centaurium</i> type, <i>Gentiana</i> , <i>Gentiana lutea/Gentiana pneumonanthe</i> , <i>Gentiana nivalis</i> type, <i>Gentiana pneumonanthe</i> , <i>Gentiana pneumonanthe</i> type, <i>Gentiana purpurea</i>                                                                                                                                                                                                                                                                                                                                                                                                                                                                                                                                                                                                                                                     |
| Family | Geraniaceae       | <i>Erodium</i> , Geraniaceae, <i>Geranium</i> , <i>Geranium sylvaticum</i> type, <i>Geranium</i> type                                                                                                                                                                                                                                                                                                                                                                                                                                                                                                                                                                                                                                                                                                                                                                                                                                                                                                                                                  |
| Genus  | <i>Halimium</i>   | <i>Halimium</i> , <i>Halimium</i> type                                                                                                                                                                                                                                                                                                                                                                                                                                                                                                                                                                                                                                                                                                                                                                                                                                                                                                                                                                                                                 |

|        |                     |                                                                                                                                                                                                                                                                                                                                                                                                                                                                                                    |
|--------|---------------------|----------------------------------------------------------------------------------------------------------------------------------------------------------------------------------------------------------------------------------------------------------------------------------------------------------------------------------------------------------------------------------------------------------------------------------------------------------------------------------------------------|
| Genus  | <i>Hedera</i>       | <i>Hedera, Hedera helix, Hedera</i> type                                                                                                                                                                                                                                                                                                                                                                                                                                                           |
| Genus  | <i>Helianthemum</i> | <i>Helianthemum, Helianthemum croceum</i> type, <i>Helianthemum nummularium</i> type, <i>Helianthemum salicifolium</i> type, <i>Helianthemum</i> type                                                                                                                                                                                                                                                                                                                                              |
| Genus  | <i>Helleborus</i>   | <i>Helleborus, Helleborus foetidus, Helleborus viridis</i> type                                                                                                                                                                                                                                                                                                                                                                                                                                    |
| Genus  | <i>Hippophae</i>    | <i>Hippophae, Hippophae rhamnoides</i>                                                                                                                                                                                                                                                                                                                                                                                                                                                             |
| Genus  | <i>Huperzia</i>     | <i>Huperzia selago, Lycopodium selago</i>                                                                                                                                                                                                                                                                                                                                                                                                                                                          |
| Family | Hymenophyllaceae    | <i>Hymenophyllum tunbrigense, Hymenophyllum wilsonii, Trichomanes speciosum</i>                                                                                                                                                                                                                                                                                                                                                                                                                    |
| Family | Hypericaceae        | <i>Hypericum, Hypericum hyssopifolium, Hypericum perforatum</i> type, <i>Hypericum pulchrum</i> type, <i>Hypericum</i> type                                                                                                                                                                                                                                                                                                                                                                        |
| Genus  | <i>Ilex</i>         | <i>Ilex, Ilex aquifolium</i>                                                                                                                                                                                                                                                                                                                                                                                                                                                                       |
| Genus  | <i>Impatiens</i>    | <i>Impatiens</i>                                                                                                                                                                                                                                                                                                                                                                                                                                                                                   |
| Family | Iridaceae           | <i>Crocus, Iridaceae, Iris, Iris pseudacorus, Iris pseudacorus</i> type, <i>Iris</i> type                                                                                                                                                                                                                                                                                                                                                                                                          |
| Genus  | <i>Jasminum</i>     | <i>Jasminum, Jasminum fruticans, Jasminum</i> type                                                                                                                                                                                                                                                                                                                                                                                                                                                 |
| Family | Juglandaceae        | Juglandaceae                                                                                                                                                                                                                                                                                                                                                                                                                                                                                       |
| Genus  | <i>Juglans</i>      | <i>Juglans, Juglans regia</i>                                                                                                                                                                                                                                                                                                                                                                                                                                                                      |
| Family | Juncaceae           | Juncaceae, <i>Juncus, Luzula</i>                                                                                                                                                                                                                                                                                                                                                                                                                                                                   |
| Genus  | <i>Kalmia</i>       | <i>Loiseleuria procumbens</i>                                                                                                                                                                                                                                                                                                                                                                                                                                                                      |
| Genus  | <i>Koenigia</i>     | <i>Koenigia islandica</i>                                                                                                                                                                                                                                                                                                                                                                                                                                                                          |
| Genus  | <i>Laburnum</i>     | <i>Laburnum anagyroides</i>                                                                                                                                                                                                                                                                                                                                                                                                                                                                        |
| Family | Lamiaceae           | <i>Ajuga, Lycopus</i> type, <i>Lycopus/Mentha, Marrubium, Mentha, Mentha</i> type, <i>Mentha/Thymus, Origanum vulgare, Phlomis, Prunella, Prunella</i> type, <i>Ballota, Prunella vulgaris</i> type, <i>Scutellaria, Scutellaria</i> type, <i>Sideritis, Stachys, Stachys sylvatica</i> type, <i>Stachys sylvestris, Stachys</i> type, <i>Thymus, Thymus serpyllum, Galeopsis, Thymus</i> type, <i>Galeopsis</i> type, <i>Glechoma</i> type, Lamiaceae, <i>Lamium, Lamium</i> type, <i>Lycopus</i> |
| Genus  | <i>Larix</i>        | <i>Larix, Larix decidua, Larix decidua</i> type, <i>Larix/Pseudotsuga</i>                                                                                                                                                                                                                                                                                                                                                                                                                          |
| Genus  | <i>Lavandula</i>    | <i>Lavandula stoechas</i> type                                                                                                                                                                                                                                                                                                                                                                                                                                                                     |
| Genus  | <i>Ledum</i>        | <i>Ledum, Ledum palustre, Ledum</i> type                                                                                                                                                                                                                                                                                                                                                                                                                                                           |
| Genus  | <i>Ligustrum</i>    | <i>Ligustrum, Ligustrum vulgare, Ligustrum vulgare</i> type                                                                                                                                                                                                                                                                                                                                                                                                                                        |
| Family | Liliaceae           | <i>Allium, Liliium martagon</i> type, <i>Lloydia serotina, Allium</i> type, <i>Anthericum, Anthericum</i> type, <i>Fritillaria lusitanica, Fritillaria</i> type, <i>Gagea, Liliaceae, Liliium</i>                                                                                                                                                                                                                                                                                                  |
| Family | Linaceae            | Linaceae, <i>Radiola linoides</i>                                                                                                                                                                                                                                                                                                                                                                                                                                                                  |
| Genus  | <i>Linnaea</i>      | <i>Linnaea, Linnaea borealis</i>                                                                                                                                                                                                                                                                                                                                                                                                                                                                   |
| Genus  | <i>Linum</i>        | <i>Linum, Linum bienne</i> type, <i>Linum catharticum, Linum catharticum</i> type, <i>Linum</i> type                                                                                                                                                                                                                                                                                                                                                                                               |
| Genus  | <i>Lonicera</i>     | <i>Lonicera, Lonicera caerulea, Lonicera hispida, Lonicera implexa, Lonicera periclymenum, Lonicera periclymenum</i> type, <i>Lonicera</i> type, <i>Lonicera xylosteum</i> type                                                                                                                                                                                                                                                                                                                    |
| Family | Loranthaceae        | Loranthaceae                                                                                                                                                                                                                                                                                                                                                                                                                                                                                       |
| Genus  | <i>Lycopodiella</i> | <i>Lepidotis inundata, Lycopodium inundatum</i>                                                                                                                                                                                                                                                                                                                                                                                                                                                    |
| Genus  | <i>Lycopodium</i>   | <i>Diphasiastrum, Lycopodium alpinum, Lycopodium annotinum, Lycopodium annotinum</i> type, <i>Lycopodium clavatum, Lycopodium clavatum</i> type, <i>Lycopodium complanatum, Lycopodium dubium, Lycopodium</i> type, <i>Diphasiastrum alpinum, Diphasium, Diphasium alpinum, Diphasium alpinum</i> type, <i>Diphasium complanatum, Diphasium tristachyum, Diphasium</i> type, <i>Lycopodium</i>                                                                                                     |

|        |                              |                                                                                                                                                                                                                                                                                                                                                                                                                                                                                                                                                                                                                                                                                                                                                                                                                                                                                                                   |
|--------|------------------------------|-------------------------------------------------------------------------------------------------------------------------------------------------------------------------------------------------------------------------------------------------------------------------------------------------------------------------------------------------------------------------------------------------------------------------------------------------------------------------------------------------------------------------------------------------------------------------------------------------------------------------------------------------------------------------------------------------------------------------------------------------------------------------------------------------------------------------------------------------------------------------------------------------------------------|
| Genus  | <i>Lysimachia</i>            | <i>Lysimachia</i> , <i>Lysimachia maritima</i> , <i>Lysimachia nemorum</i> , <i>Lysimachia thysiflora</i> , <i>Lysimachia</i> type, <i>Lysimachia vulgaris</i> , <i>Lysimachia vulgaris</i> type                                                                                                                                                                                                                                                                                                                                                                                                                                                                                                                                                                                                                                                                                                                  |
| Family | Lythraceae                   | Lythraceae, <i>Lythrum</i> , <i>Lythrum salicaria</i> , <i>Lythrum salicaria</i> type, <i>Lythrum salicaria</i> / <i>Lythrum hyssopifolia</i> , <i>Peplis</i>                                                                                                                                                                                                                                                                                                                                                                                                                                                                                                                                                                                                                                                                                                                                                     |
| Family | Magnoliaceae                 | Magnoliaceae                                                                                                                                                                                                                                                                                                                                                                                                                                                                                                                                                                                                                                                                                                                                                                                                                                                                                                      |
| Genus  | <i>Malus</i>                 | <i>Malus</i> , <i>Malus</i> type                                                                                                                                                                                                                                                                                                                                                                                                                                                                                                                                                                                                                                                                                                                                                                                                                                                                                  |
| Family | Malvaceae                    | <i>Hibiscus</i> , <i>Lavatera</i> type, <i>Malva</i> , <i>Malva sylvestris</i> type, Malvaceae, <i>Sterculia</i>                                                                                                                                                                                                                                                                                                                                                                                                                                                                                                                                                                                                                                                                                                                                                                                                  |
| Family | Melanthiaceae                | <i>Veratrum</i> , <i>Veratrum</i> type                                                                                                                                                                                                                                                                                                                                                                                                                                                                                                                                                                                                                                                                                                                                                                                                                                                                            |
| Genus  | <i>Mercurialis</i>           | <i>Mercurialis</i> , <i>Mercurialis annua</i> , <i>Mercurialis annua</i> type, <i>Mercurialis perennis</i> , <i>Mercurialis perennis</i> type                                                                                                                                                                                                                                                                                                                                                                                                                                                                                                                                                                                                                                                                                                                                                                     |
| Genus  | <i>Moltkia</i>               | <i>Moltkia</i>                                                                                                                                                                                                                                                                                                                                                                                                                                                                                                                                                                                                                                                                                                                                                                                                                                                                                                    |
| Family | Montiaceae                   | <i>Montia</i>                                                                                                                                                                                                                                                                                                                                                                                                                                                                                                                                                                                                                                                                                                                                                                                                                                                                                                     |
| Family | Moraceae                     | Moraceae, <i>Morus</i> , <i>Morus alba</i> , <i>Morus alba</i> type, <i>Morus nigra</i>                                                                                                                                                                                                                                                                                                                                                                                                                                                                                                                                                                                                                                                                                                                                                                                                                           |
| Genus  | <i>Myrica</i>                | <i>Corylus</i> / <i>Myrica</i> , <i>Myrica</i> , <i>Myrica gale</i> , <i>Myrica gale</i> type, <i>Myrica</i> type                                                                                                                                                                                                                                                                                                                                                                                                                                                                                                                                                                                                                                                                                                                                                                                                 |
| Genus  | <i>Myricaria</i>             | <i>Myricaria</i>                                                                                                                                                                                                                                                                                                                                                                                                                                                                                                                                                                                                                                                                                                                                                                                                                                                                                                  |
| Family | Myrtaceae                    | Myrtaceae, <i>Myrtus</i> , <i>Myrtus communis</i>                                                                                                                                                                                                                                                                                                                                                                                                                                                                                                                                                                                                                                                                                                                                                                                                                                                                 |
| Family | Nartheciaceae                | <i>Narthecium</i> , <i>Narthecium ossifragum</i> , <i>Narthecium</i> type                                                                                                                                                                                                                                                                                                                                                                                                                                                                                                                                                                                                                                                                                                                                                                                                                                         |
| Genus  | <i>Nerium</i>                | <i>Nerium</i> , <i>Nerium oleander</i>                                                                                                                                                                                                                                                                                                                                                                                                                                                                                                                                                                                                                                                                                                                                                                                                                                                                            |
| Genus  | <i>Nigella</i>               | <i>Nigella</i>                                                                                                                                                                                                                                                                                                                                                                                                                                                                                                                                                                                                                                                                                                                                                                                                                                                                                                    |
| Family | Nitrariaceae                 | <i>Nitraria</i> , <i>Peganum harmala</i>                                                                                                                                                                                                                                                                                                                                                                                                                                                                                                                                                                                                                                                                                                                                                                                                                                                                          |
| Genus  | <i>Olea</i>                  | <i>Olea</i> , <i>Olea europaea</i> , <i>Olea</i> type                                                                                                                                                                                                                                                                                                                                                                                                                                                                                                                                                                                                                                                                                                                                                                                                                                                             |
| Family | Oleaceae                     | <i>Fontanesia</i> / <i>Phillyrea</i> , <i>Olea</i> / <i>Ligustrum</i> , Oleaceae                                                                                                                                                                                                                                                                                                                                                                                                                                                                                                                                                                                                                                                                                                                                                                                                                                  |
| Family | Onagraceae                   | <i>Chamaenerion</i> , <i>Chamaenerion angustifolium</i> , <i>Circaea</i> , <i>Epilobium</i> , <i>Epilobium</i> type, Onagraceae                                                                                                                                                                                                                                                                                                                                                                                                                                                                                                                                                                                                                                                                                                                                                                                   |
| Genus  | <i>Ononis</i>                | <i>Ononis</i> , <i>Ononis</i> type                                                                                                                                                                                                                                                                                                                                                                                                                                                                                                                                                                                                                                                                                                                                                                                                                                                                                |
| Family | Ophioglossaceae              | <i>Botrychium</i> , <i>Botrychium lunaria</i> , <i>Botrychium lunaria</i> type, <i>Botrychium</i> type, Ophioglossaceae, <i>Ophioglossum</i> , <i>Ophioglossum vulgatum</i>                                                                                                                                                                                                                                                                                                                                                                                                                                                                                                                                                                                                                                                                                                                                       |
| Family | Orchidaceae                  | <i>Neottia</i> type, Orchidaceae                                                                                                                                                                                                                                                                                                                                                                                                                                                                                                                                                                                                                                                                                                                                                                                                                                                                                  |
| Family | Orobanchaceae                | <i>Euphrasia</i> , <i>Euphrasia</i> type, <i>Melampyrum</i> , <i>Pedicularis</i> , <i>Pedicularis oederi</i> type, <i>Pedicularis palustris</i> type, <i>Pedicularis</i> type, <i>Rhinanthus</i> , <i>Rhinanthus</i> type                                                                                                                                                                                                                                                                                                                                                                                                                                                                                                                                                                                                                                                                                         |
| Family | Osmundaceae                  | <i>Osmunda</i> , <i>Osmunda regalis</i>                                                                                                                                                                                                                                                                                                                                                                                                                                                                                                                                                                                                                                                                                                                                                                                                                                                                           |
| Family | Oxalidaceae                  | Oxalidaceae, <i>Oxalis</i> , <i>Oxalis acetosella</i> , <i>Oxalis stricta</i>                                                                                                                                                                                                                                                                                                                                                                                                                                                                                                                                                                                                                                                                                                                                                                                                                                     |
| Genus  | <i>Oxyria</i> / <i>Rumex</i> | <i>Oxyria</i> , <i>Rumex acetosa</i> / <i>Rumex acetosella</i> , <i>Rumex acetosa</i> / <i>Rumex acetosella</i> type, <i>Rumex acetosa</i> / <i>Rumex scutatus</i> type, <i>Rumex acetosella</i> , <i>Rumex acetosella</i> type, <i>Rumex alpestris</i> , <i>Rumex alpinus</i> , <i>Rumex alpinus</i> type, <i>Rumex aquaticus</i> , <i>Rumex aquaticus</i> type, <i>Oxyria digyna</i> , <i>Rumex conglomeratus</i> type, <i>Rumex crispus</i> , <i>Rumex crispus</i> type, <i>Rumex hydrolapathum</i> , <i>Rumex hydrolapathum</i> type, <i>Rumex longifolius</i> , <i>Rumex longifolius</i> type, <i>Rumex obtusifolius</i> type, <i>Rumex patentia</i> type, <i>Rumex sanguineus</i> type, <i>Oxyria</i> type, <i>Rumex</i> type, <i>Oxyria</i> / <i>Rumex</i> , <i>Oxyria</i> / <i>Rumex</i> type, <i>Rumex</i> , <i>Rumex acetosa</i> , <i>Rumex acetosa</i> type, <i>Rumex acetosa</i> / <i>Oxyria</i> type |
| Genus  | <i>Paeonia</i>               | <i>Paeonia</i>                                                                                                                                                                                                                                                                                                                                                                                                                                                                                                                                                                                                                                                                                                                                                                                                                                                                                                    |
| Genus  | <i>Paliurus</i>              | <i>Paliurus</i> , <i>Paliurus spina-christi</i>                                                                                                                                                                                                                                                                                                                                                                                                                                                                                                                                                                                                                                                                                                                                                                                                                                                                   |



|                 |                           |                                                                                                                                                                                                                                                                                                                                                                                                                                                                                                                                                                                                                                                                                                                                                                                                                                                             |
|-----------------|---------------------------|-------------------------------------------------------------------------------------------------------------------------------------------------------------------------------------------------------------------------------------------------------------------------------------------------------------------------------------------------------------------------------------------------------------------------------------------------------------------------------------------------------------------------------------------------------------------------------------------------------------------------------------------------------------------------------------------------------------------------------------------------------------------------------------------------------------------------------------------------------------|
| Family          | Papaveraceae              | <i>Chelidonium majus</i> , <i>Papaver</i> , <i>Papaver argemone</i> , <i>Papaver rhoeas</i> type, <i>Papaver</i> type, Papaveraceae, <i>Roemeria</i> , <i>Corydalis</i> , <i>Corydalis solida</i> type, <i>Corydalis</i> type, <i>Fumana</i> , <i>Fumaria</i> , <i>Fumaria officinalis</i> type, <i>Glaucium</i> , <i>Hypecoum</i>                                                                                                                                                                                                                                                                                                                                                                                                                                                                                                                          |
| Genus           | <i>Parrotia</i>           | <i>Parrotia persica</i>                                                                                                                                                                                                                                                                                                                                                                                                                                                                                                                                                                                                                                                                                                                                                                                                                                     |
| Genus           | <i>Periploca</i>          | <i>Periploca</i>                                                                                                                                                                                                                                                                                                                                                                                                                                                                                                                                                                                                                                                                                                                                                                                                                                            |
| Genus           | <i>Phillyrea</i>          | <i>Olea/Phillyrea</i> , <i>Phillyrea</i> , <i>Phillyrea angustifolia</i> , <i>Phillyrea angustifolia</i> type, <i>Phillyrea media</i> , <i>Phillyrea</i> type                                                                                                                                                                                                                                                                                                                                                                                                                                                                                                                                                                                                                                                                                               |
| Family          | Phyllanthaceae            | <i>Andrachne</i> , <i>Andrachne telephioides</i>                                                                                                                                                                                                                                                                                                                                                                                                                                                                                                                                                                                                                                                                                                                                                                                                            |
| Genus           | <i>Picea</i>              | <i>Picea</i> , <i>Picea abies</i> , <i>Picea abies subsp abies</i>                                                                                                                                                                                                                                                                                                                                                                                                                                                                                                                                                                                                                                                                                                                                                                                          |
| Genus           | <i>Picea orientalis</i>   | <i>Picea orientalis</i>                                                                                                                                                                                                                                                                                                                                                                                                                                                                                                                                                                                                                                                                                                                                                                                                                                     |
| Genus           | <i>Pinus</i>              | <i>Pinus</i>                                                                                                                                                                                                                                                                                                                                                                                                                                                                                                                                                                                                                                                                                                                                                                                                                                                |
| Genus sub-group | <i>Pinus (diploxylon)</i> | <i>Pinus (Diploxylon)</i> , <i>Pinus subg. Pinus</i> , <i>Pinus sylvestris</i> , <i>Pinus sylvestris</i> type, <i>Pinus sylvestris/Pinus nigra</i> type, <i>Pinus</i> type, <i>Pinus halepensis</i> , <i>Pinus nigra</i> type, <i>Pinus non-cembra</i> , <i>Pinus pinaster</i> , <i>Pinus pinaster</i> type, <i>Pinus pinaster/Pinus halepensis</i> , <i>Pinus pinea</i> type, <i>Pinus pinea/Pinus halepensis</i> type                                                                                                                                                                                                                                                                                                                                                                                                                                     |
| Genus sub-group | <i>Pinus (haploxylon)</i> | <i>Pinus (Haploxylon)</i> , <i>Pinus cembra</i> , <i>Pinus cembra</i> type, <i>Pinus peuce</i> , <i>Pinus sibirica</i>                                                                                                                                                                                                                                                                                                                                                                                                                                                                                                                                                                                                                                                                                                                                      |
| Genus           | <i>Pistacia</i>           | <i>Pistacia</i> , <i>Pistacia lentiscus</i> , <i>Pistacia lentiscus</i> type, <i>Pistacia terebinthus</i> , <i>Pistacia terebinthus</i> type, <i>Pistacia</i> type                                                                                                                                                                                                                                                                                                                                                                                                                                                                                                                                                                                                                                                                                          |
| Family          | Plantaginaceae            | <i>Globularia</i> , <i>Plantago coronopus</i> type, <i>Plantago cylindrica</i> type, <i>Plantago lanceolata</i> , <i>Plantago lanceolata</i> type, <i>Plantago lusitanica</i> , <i>Plantago major</i> , <i>Plantago major</i> type, <i>Plantago major/Plantago media</i> , <i>Plantago maritima</i> , <i>Plantago maritima</i> , <i>Gratiola officinalis</i> , <i>Plantago maritima</i> type, <i>Plantago media</i> , <i>Plantago media</i> type, <i>Plantago media/Plantago major</i> , <i>Plantago media/Plantago major</i> type, <i>Plantago montana</i> type, <i>Plantago ovata</i> type, <i>Plantago psyllium</i> type, <i>Plantago tenuiflora</i> type, <i>Plantago</i> type, Plantaginaceae, <i>Plantago</i> , <i>Plantago afra</i> type, <i>Plantago albicans</i> , <i>Plantago alpina</i> , <i>Plantago alpina</i> type, <i>Plantago coronopus</i> |
| Genus           | <i>Platanus</i>           | <i>Platanus</i> , <i>Platanus orientalis</i> , <i>Platanus</i> type                                                                                                                                                                                                                                                                                                                                                                                                                                                                                                                                                                                                                                                                                                                                                                                         |
| Family          | Plumbaginaceae            | <i>Acantholimon</i> , <i>Limonium vulgare</i> , Plumbaginaceae, <i>Plumbago</i> , <i>Armeria</i> , <i>Armeria maritima</i> , <i>Armeria maritima subsp elongata</i> , <i>Armeria</i> type, <i>Armeria/Limonium</i> , <i>Armeria/Limonium</i> type, <i>Limonium</i> , <i>Limonium</i> type                                                                                                                                                                                                                                                                                                                                                                                                                                                                                                                                                                   |
| Family          | Poaceae                   | <i>Anthoxanthum</i> , <i>Stipa</i> , <i>Deschampsia</i> , <i>Elymus</i> , <i>Lygeum</i> , <i>Lygeum spartum</i> , <i>Nardus</i> , <i>Poa/Festuca</i> type, Poaceae, <i>Setaria</i>                                                                                                                                                                                                                                                                                                                                                                                                                                                                                                                                                                                                                                                                          |
| Family          | Polemoniaceae             | Polemoniaceae, <i>Polemonium</i>                                                                                                                                                                                                                                                                                                                                                                                                                                                                                                                                                                                                                                                                                                                                                                                                                            |
| Family          | Polygalaceae              | <i>Polygala</i> , <i>Polygala</i> type, <i>Polygala vulgaris</i> , <i>Polygala vulgaris</i> type, Polygalaceae, <i>Polygaloides chamaebuxus</i>                                                                                                                                                                                                                                                                                                                                                                                                                                                                                                                                                                                                                                                                                                             |
| Family          | Polygonaceae              | <i>Atraphaxis</i> , <i>Persicaria amphibia</i> , Polygonaceae, <i>Pteropyrum</i> , <i>Rheum</i> , <i>Rheum ribes</i> , <i>Rheum</i> type, <i>Bilderdykia convolvulus</i> , <i>Bilderdykia convolvulus</i> type, <i>Bistorta officinalis</i> type, <i>Bistorta vivipara</i> , <i>Calligonum</i> , <i>Fallopia convolvulus</i> , <i>Fallopia convolvulus</i> type, <i>Persicaria</i>                                                                                                                                                                                                                                                                                                                                                                                                                                                                          |

|        |                               |                                                                                                                                                                                                                                                                                                                                                                                                                                                                                                                                                                                                                                                                                                                                                                                                                                                                                                                                                                                                                                                                                                                                                                                |
|--------|-------------------------------|--------------------------------------------------------------------------------------------------------------------------------------------------------------------------------------------------------------------------------------------------------------------------------------------------------------------------------------------------------------------------------------------------------------------------------------------------------------------------------------------------------------------------------------------------------------------------------------------------------------------------------------------------------------------------------------------------------------------------------------------------------------------------------------------------------------------------------------------------------------------------------------------------------------------------------------------------------------------------------------------------------------------------------------------------------------------------------------------------------------------------------------------------------------------------------|
| Genus  | <i>Polygonum</i>              | <i>Polygonum</i> , <i>Polygonum convolvulus</i> , <i>Polygonum convolvulus</i> type, <i>Polygonum oxyspermum</i> type, <i>Polygonum persicaria</i> , <i>Polygonum persicaria</i> type, <i>Polygonum</i> sect. <i>Persicaria</i> , <i>Polygonum</i> type, <i>Polygonum viviparum</i> , <i>Polygonum alpinum</i> , <i>Polygonum amphibium</i> , <i>Polygonum amphibium</i> type, <i>Polygonum aviculare</i> , <i>Polygonum aviculare</i> type, <i>Polygonum bistorta</i> , <i>Polygonum bistorta</i> type, <i>Polygonum bistorta</i> / <i>Polygonum viviparum</i>                                                                                                                                                                                                                                                                                                                                                                                                                                                                                                                                                                                                                |
| Genus  | <i>Polypodiales</i>           | <i>Aspidium</i> , <i>Blechnum</i> , <i>Blechnum spicant</i> , <i>Cystopteris</i> , <i>Cystopteris fragilis</i> , <i>Cystopteris</i> type, <i>Dryopteridaceae</i> / <i>Polypodiaceae</i> , <i>Dryopteris</i> , <i>Dryopteris carthusiana</i> , <i>Dryopteris carthusiana</i> type, <i>Dryopteris cristata</i> , <i>Asplenium</i> , <i>Dryopteris cristata</i> type, <i>Dryopteris dilatata</i> , <i>Dryopteris dilatata</i> type, <i>Dryopteris filix-mas</i> , <i>Dryopteris filix-mas</i> type, <i>Dryopteris</i> type, <i>Dryopteris/Thelypteris</i> , <i>Grammitis</i> , <i>Gymnocarpium</i> , <i>Gymnocarpium dryopteris</i> , <i>Asplenium nidus</i> , <i>Pilularia</i> , <i>Polypodiaceae</i> , <i>Polypodiales</i> , <i>Polypodium</i> , <i>Polypodium vulgare</i> , <i>Polypodium vulgare</i> type, <i>Polystichum</i> , <i>Polystichum</i> type, <i>Thelypteris</i> , <i>Thelypteris palustris</i> , <i>Asplenium</i> type, <i>Thelypteris palustris</i> type, <i>Thelypteris phegopteris</i> , <i>Thelypteris</i> type, <i>Asplenium viride</i> , <i>Athyrium</i> , <i>Athyrium alpestre</i> type, <i>Athyrium distentifolium</i> type, <i>Athyrium filix-femina</i> |
| Genus  | <i>Populus</i>                | <i>Populus</i> , <i>Populus tremula</i> , <i>Populus tremula</i> type                                                                                                                                                                                                                                                                                                                                                                                                                                                                                                                                                                                                                                                                                                                                                                                                                                                                                                                                                                                                                                                                                                          |
| Family | Portulacaceae                 | Portulacaceae                                                                                                                                                                                                                                                                                                                                                                                                                                                                                                                                                                                                                                                                                                                                                                                                                                                                                                                                                                                                                                                                                                                                                                  |
| Genus  | <i>Potentilla</i>             | <i>Potentilla</i> , <i>Potentilla aurea</i> , <i>Potentilla micrantha</i> type, <i>Potentilla recta</i> , <i>Potentilla</i> type                                                                                                                                                                                                                                                                                                                                                                                                                                                                                                                                                                                                                                                                                                                                                                                                                                                                                                                                                                                                                                               |
| Family | Primulaceae                   | <i>Anagallis</i> , <i>Primula</i> , <i>Primula clusiana</i> type, <i>Primula farinosa</i> , <i>Primula farinosa</i> type, <i>Primula hirsuta</i> type, <i>Primula</i> type, <i>Primula veris</i> type, <i>Primula vulgaris</i> type, <i>Primulaceae</i> , <i>Soldanella</i> , <i>Anagallis arvensis</i> , <i>Trientalis</i> , <i>Trientalis europaea</i> , <i>Anagallis arvensis</i> type, <i>Anagallis tenella</i> , <i>Anagallis</i> type, <i>Androsace</i> , <i>Androsaceae</i> , <i>Cyclamen</i> , <i>Cyclamen hederifolium</i>                                                                                                                                                                                                                                                                                                                                                                                                                                                                                                                                                                                                                                            |
| Genus  | <i>Prosopis</i>               | <i>Lagonychium</i> type, <i>Prosopis</i>                                                                                                                                                                                                                                                                                                                                                                                                                                                                                                                                                                                                                                                                                                                                                                                                                                                                                                                                                                                                                                                                                                                                       |
| Genus  | <i>Prunus</i>                 | <i>Prunus</i> , <i>Prunus avium</i> , <i>Prunus padus</i> , <i>Prunus spinosa</i> type, <i>Prunus</i> type                                                                                                                                                                                                                                                                                                                                                                                                                                                                                                                                                                                                                                                                                                                                                                                                                                                                                                                                                                                                                                                                     |
| Family | Pteridaceae                   | <i>Adiantum</i> , <i>Cheilanthes</i> , <i>Cryptogramma</i> , <i>Cryptogramma crispa</i> , <i>Cryptogramma crispa</i> type, <i>Pteris</i>                                                                                                                                                                                                                                                                                                                                                                                                                                                                                                                                                                                                                                                                                                                                                                                                                                                                                                                                                                                                                                       |
| Genus  | <i>Pterocarya</i>             | <i>Pterocarya</i> , <i>Pterocarya fraxinifolia</i>                                                                                                                                                                                                                                                                                                                                                                                                                                                                                                                                                                                                                                                                                                                                                                                                                                                                                                                                                                                                                                                                                                                             |
| Genus  | <i>Punica</i>                 | <i>Punica</i>                                                                                                                                                                                                                                                                                                                                                                                                                                                                                                                                                                                                                                                                                                                                                                                                                                                                                                                                                                                                                                                                                                                                                                  |
| Genus  | <i>Pyrus</i>                  | <i>Pyrus</i> , <i>Pyrus</i> type                                                                                                                                                                                                                                                                                                                                                                                                                                                                                                                                                                                                                                                                                                                                                                                                                                                                                                                                                                                                                                                                                                                                               |
| Genus  | <i>Quercus</i> (deciduous)    | <i>Quercus</i> , <i>Quercus robur</i> type, <i>Quercus robur</i> / <i>Quercus petraea</i> , <i>Quercus</i> (deciduous), <i>Quercus cerris</i> , <i>Quercus cerris</i> type, <i>Quercus deciduous</i> , <i>Quercus ithaburensis</i> , <i>Quercus ithaburensis</i> type, <i>Quercus petraea</i> , <i>Quercus robur</i>                                                                                                                                                                                                                                                                                                                                                                                                                                                                                                                                                                                                                                                                                                                                                                                                                                                           |
| Genus  | <i>Quercus</i> (evergreen)    | <i>Quercus</i> (evergreen), <i>Quercus rotundifolia</i> type, <i>Quercus suber</i> , <i>Quercus suber</i> type, <i>Quercus calliprinos</i> , <i>Quercus calliprinos</i> type, <i>Quercus coccifera</i> , <i>Quercus coccifera</i> type, <i>Quercus coccifera</i> / <i>Quercus ilex</i> , <i>Quercus evergreen</i> , <i>Quercus ilex</i> , <i>Quercus ilex</i> type                                                                                                                                                                                                                                                                                                                                                                                                                                                                                                                                                                                                                                                                                                                                                                                                             |
| Genus  | <i>Quercus</i> (intermediate) | <i>Quercus canariensis</i> type, <i>Quercus cerris</i> / <i>Quercus suber</i> , <i>Quercus cerris</i> / <i>Quercus suber</i> type, <i>Quercus faginea</i> , <i>Quercus faginea</i> / <i>Quercus pubescens</i> , <i>Quercus faginea</i> / <i>Quercus pyrenaica</i> , <i>Quercus pubescens</i> type, <i>Quercus pyrenaica</i> type, <i>Quercus robur</i> / <i>Quercus pubescens</i> type                                                                                                                                                                                                                                                                                                                                                                                                                                                                                                                                                                                                                                                                                                                                                                                         |
| Family | Ranunculaceae                 | <i>Anemone</i> , <i>Anemone nemorosa</i> , <i>Anemone nemorosa</i> type, <i>Anemone nemorosa</i> type/ <i>Hepatica nobilis</i> , <i>Anemone nemorosa</i> / <i>Anemone ranunculoides</i> , <i>Anemone</i> type, <i>Hepatica</i> , <i>Pulsatilla</i> , <i>Ranunculaceae</i>                                                                                                                                                                                                                                                                                                                                                                                                                                                                                                                                                                                                                                                                                                                                                                                                                                                                                                      |

|        |                          |                                                                                                                                                                                                                                                                                                                                                                                                                                                                                                                                                                                                                 |
|--------|--------------------------|-----------------------------------------------------------------------------------------------------------------------------------------------------------------------------------------------------------------------------------------------------------------------------------------------------------------------------------------------------------------------------------------------------------------------------------------------------------------------------------------------------------------------------------------------------------------------------------------------------------------|
| Genus  | <i>Ranunculus</i>        | <i>Ranunculus</i> , <i>Ranunculus ficaria</i> type, <i>Ranunculus flammula</i> type, <i>Ranunculus glacialis</i> type, <i>Ranunculus montanus</i> type, <i>Ranunculus muricatus</i> type, <i>Ranunculus nivalis</i> type, <i>Ranunculus parviflorus</i> , <i>Ranunculus repens</i> type, <i>Ranunculus sceleratus</i> type, <i>Ranunculus</i> type, <i>Ranunculus acer</i> type, <i>Ranunculus aconitifolius</i> , <i>Ranunculus aconitifolius</i> type, <i>Ranunculus acris</i> , <i>Ranunculus acris</i> type, <i>Ranunculus arvensis</i> , <i>Ranunculus arvensis</i> type, <i>Ranunculus asiaticus</i> type |
| Family | Resedaceae               | <i>Reseda</i> , <i>Reseda lutea</i> type, Resedaceae                                                                                                                                                                                                                                                                                                                                                                                                                                                                                                                                                            |
| Family | Rhamnaceae               | Rhamnaceae                                                                                                                                                                                                                                                                                                                                                                                                                                                                                                                                                                                                      |
| Genus  | <i>Rhamnus</i>           | <i>Rhamnus</i> , <i>Rhamnus catharticus</i> , <i>Rhamnus</i> type                                                                                                                                                                                                                                                                                                                                                                                                                                                                                                                                               |
| Genus  | <i>Rhododendron</i>      | <i>Rhododendron</i> , <i>Rhododendron ferrugineum</i> , <i>Rhododendron</i> type                                                                                                                                                                                                                                                                                                                                                                                                                                                                                                                                |
| Genus  | <i>Rhus</i>              | <i>Rhus</i> , <i>Rhus coriaria</i>                                                                                                                                                                                                                                                                                                                                                                                                                                                                                                                                                                              |
| Genus  | <i>Ribes</i>             | <i>Ribes</i> , <i>Ribes</i> type                                                                                                                                                                                                                                                                                                                                                                                                                                                                                                                                                                                |
| Family | Rosaceae                 | <i>Agrimonia</i> , <i>Fragaria</i> type, <i>Geum</i> , <i>Geum rivale</i> type, <i>Geum</i> type, <i>Pirus</i> type, <i>Prunus/Rubus</i> type, <i>Pyrus/Malus</i> , <i>Rosa</i> , <i>Rosa canina</i> type, <i>Rosa</i> type, <i>Agrimonia eupatoria</i> , <i>Rosa/Prunus</i> , Rosaceae, <i>Spiraea</i> , <i>Alchemilla</i> , <i>Alchemilla</i> type, <i>Filipendula</i> , <i>Filipendula</i> type, <i>Filipendula ulmaria</i> , <i>Filipendula vulgaris</i> , <i>Fragaria</i>                                                                                                                                  |
| Genus  | <i>Rosmarinus</i>        | <i>Rosmarinus</i> , <i>Rosmarinus</i> type                                                                                                                                                                                                                                                                                                                                                                                                                                                                                                                                                                      |
| Family | Rubiaceae                | <i>Asperula</i> , <i>Galium</i> , <i>Galium</i> type, Rubiaceae, <i>Theligonum</i>                                                                                                                                                                                                                                                                                                                                                                                                                                                                                                                              |
| Genus  | <i>Rubus</i>             | <i>Rubus</i> , <i>Rubus arcticus</i> , <i>Rubus arcticus</i> type, <i>Rubus chamaemorus</i> , <i>Rubus fruticosus</i> type, <i>Rubus idaeus</i> type, <i>Rubus saxatilis</i> , <i>Rubus</i> type                                                                                                                                                                                                                                                                                                                                                                                                                |
| Genus  | <i>Ruscus</i>            | <i>Ruscus</i>                                                                                                                                                                                                                                                                                                                                                                                                                                                                                                                                                                                                   |
| Family | Rutaceae                 | <i>Haplophyllum</i> , <i>Ruta</i> , Rutaceae                                                                                                                                                                                                                                                                                                                                                                                                                                                                                                                                                                    |
| Genus  | <i>Salix</i>             | <i>Salix</i> , <i>Salix glauca</i> type, <i>Salix helvetica</i> type, <i>Salix herbacea</i> , <i>Salix herbacea</i> type, <i>Salix herbacea/Salix reticulata</i> , <i>Salix pentandra</i> type                                                                                                                                                                                                                                                                                                                                                                                                                  |
| Genus  | <i>Salvia</i>            | <i>Salvia</i> , <i>Salvia verticillata</i> type                                                                                                                                                                                                                                                                                                                                                                                                                                                                                                                                                                 |
| Genus  | <i>Sambucus</i>          | <i>Sambucus</i> , <i>Sambucus ebulus</i> , <i>Sambucus nigra</i> , <i>Sambucus nigra</i> type, <i>Sambucus nigra/Sambucus racemosa</i> , <i>Sambucus racemosa</i> , <i>Sambucus</i> type                                                                                                                                                                                                                                                                                                                                                                                                                        |
| Genus  | <i>Sanguisorba</i> group | <i>Poterium</i> , <i>Sanguisorba</i> , <i>Sanguisorba minor</i> , <i>Sanguisorba minor</i> ssp <i>minor</i> , <i>Sanguisorba minor</i> type, <i>Sanguisorba officinalis</i> , <i>Sanguisorba</i> type, <i>Sarcopoterium</i>                                                                                                                                                                                                                                                                                                                                                                                     |
| Family | Santalaceae              | <i>Arceuthobium oxycedri</i> , <i>Comandra elegans</i> , <i>Osyris alba</i> type, <i>Thesium</i>                                                                                                                                                                                                                                                                                                                                                                                                                                                                                                                |
| Family | Saxifragaceae            | <i>Chrysosplenium</i> , <i>Saxifraga oppositifolia</i> , <i>Saxifraga oppositifolia</i> type, <i>Saxifraga paniculata</i> type, <i>Saxifraga stellaris</i> , <i>Saxifraga stellaris</i> type, <i>Saxifraga tricuspidata</i> , Saxifragaceae, <i>Chrysosplenium</i> type, <i>Micranthes nivalis</i> type, <i>Saxifraga</i> , <i>Saxifraga cernua</i> type, <i>Saxifraga cespitosa</i> type, <i>Saxifraga foliolosa</i> type, <i>Saxifraga granulata</i> , <i>Saxifraga granulata</i> type                                                                                                                        |
| Family | Scrophulariaceae         | <i>Antirrhinum</i> type, <i>Scrophularia/Verbascum</i> , Scrophulariaceae, <i>Verbascum</i> , <i>Verbascum</i> type, <i>Veronica</i> , <i>Veronica</i> type, <i>Antirrhinum/Linaria</i> , <i>Digitalis</i> , <i>Digitalis purpurea</i> type, <i>Digitalis</i> type, <i>Linaria</i> , <i>Linaria</i> type, <i>Scrophularia</i> , <i>Scrophularia</i> type                                                                                                                                                                                                                                                        |
| Genus  | <i>Smilax</i>            | <i>Smilax</i>                                                                                                                                                                                                                                                                                                                                                                                                                                                                                                                                                                                                   |
| Family | Solanaceae               | <i>Capsicum</i> type, <i>Lycium</i> , Solanaceae, <i>Solanum</i> , <i>Solanum dulcamara</i> , <i>Solanum nigrum</i> , <i>Solanum nigrum</i> type                                                                                                                                                                                                                                                                                                                                                                                                                                                                |
| Genus  | <i>Sorbus</i>            | <i>Sorbus</i> , <i>Sorbus aria</i> , <i>Sorbus aucuparia</i> , <i>Sorbus aucuparia</i> type, <i>Sorbus</i> type                                                                                                                                                                                                                                                                                                                                                                                                                                                                                                 |

|        |                      |                                                                                                                                                                                                                                                                         |
|--------|----------------------|-------------------------------------------------------------------------------------------------------------------------------------------------------------------------------------------------------------------------------------------------------------------------|
| Genus  | <i>Styrax</i>        | <i>Styrax officinalis</i>                                                                                                                                                                                                                                               |
| Genus  | <i>Suaeda</i>        | <i>Suaeda</i> , <i>Suaeda</i> type                                                                                                                                                                                                                                      |
| Genus  | <i>Syringa</i>       | <i>Syringa</i>                                                                                                                                                                                                                                                          |
| Genus  | <i>Tamarix</i>       | <i>Tamarix</i>                                                                                                                                                                                                                                                          |
| Genus  | <i>Taxus</i>         | <i>Taxus</i> , <i>Taxus baccata</i>                                                                                                                                                                                                                                     |
| Genus  | <i>Teucrium</i>      | <i>Teucrium</i> , <i>Teucrium</i> type                                                                                                                                                                                                                                  |
| Genus  | <i>Thalictrum</i>    | <i>Thalictrum</i> , <i>Thalictrum alpinum</i> , <i>Thalictrum aquilegifolium</i> , <i>Thalictrum flavum</i> type, <i>Thalictrum lucidum</i> , <i>Thalictrum</i> type                                                                                                    |
| Family | Thymelaeaceae        | <i>Thymelaea</i> , Thymelaeaceae                                                                                                                                                                                                                                        |
| Genus  | <i>Tilia</i>         | <i>Tilia</i> , <i>Tilia cordata</i> , <i>Tilia cordata</i> type, <i>Tilia platyphyllos</i> , <i>Tilia platyphyllos</i> type                                                                                                                                             |
| Genus  | <i>Tofieldia</i>     | <i>Tofieldia</i>                                                                                                                                                                                                                                                        |
| Genus  | <i>Trollius</i>      | <i>Trollius</i> , <i>Trollius europaeus</i> , <i>Trollius</i> type                                                                                                                                                                                                      |
| Genus  | <i>Ulmus</i>         | <i>Ulmus</i> , <i>Ulmus glabra</i> , <i>Ulmus glabra</i> type, <i>Ulmus minor</i>                                                                                                                                                                                       |
| Genus  | <i>Ulmus/Zelkova</i> | <i>Ulmus/Zelkova</i> , <i>Zelkova</i> , <i>Zelkova</i> type                                                                                                                                                                                                             |
| Family | Urticaceae           | <i>Parietaria</i> , <i>Parietaria/Urtica</i> , <i>Urtica</i> , <i>Urtica dioica</i> , <i>Urtica dioica</i> type, <i>Urtica pilulifera</i> type, <i>Urtica</i> type, <i>Urtica urens</i> , Urticaceae                                                                    |
| Genus  | <i>Vaccinium</i>     | <i>Vaccinium</i> , <i>Vaccinium myrtillus</i> , <i>Vaccinium myrtillus</i> type, <i>Vaccinium oxycoccos</i> , <i>Vaccinium</i> type, <i>Vaccinium uliginosum</i> type, <i>Vaccinium/Oxycoccos</i>                                                                       |
| Family | Valerianaceae        | <i>Centranthus</i> , <i>Valerianella</i> , <i>Valeriana</i> , <i>Valeriana dioica</i> type, <i>Valeriana officinalis</i> , <i>Valeriana officinalis</i> type, <i>Valeriana sambucifolia</i> type, <i>Valeriana tripteris</i> type, <i>Valeriana</i> type, Valerianaceae |
| Family | Verbenaceae          | <i>Verbena</i> , <i>Verbena officinalis</i>                                                                                                                                                                                                                             |
| Genus  | <i>Viburnum</i>      | <i>Viburnum</i> , <i>Viburnum opulus</i> , <i>Viburnum opulus</i> type, <i>Viburnum</i> type                                                                                                                                                                            |
| Family | Violaceae            | <i>Viola</i> , <i>Viola arvensis</i> type, <i>Viola canina</i> type, <i>Viola palustris</i> , <i>Viola palustris</i> type, <i>Viola tricolor</i> , <i>Viola tricolor/Viola arvensis</i> , Violaceae                                                                     |
| Genus  | <i>Viscum</i>        | <i>Viscum</i> , <i>Viscum album</i> , <i>Viscum album</i> type, <i>Viscum</i> type                                                                                                                                                                                      |
| Genus  | <i>Vitex</i>         | <i>Vitex</i>                                                                                                                                                                                                                                                            |
| Genus  | <i>Ziziphus</i>      | <i>Ziziphus</i> type, <i>Zizyphus</i> , <i>Zizyphus lotus</i>                                                                                                                                                                                                           |
| Family | Zygophyllaceae       | <i>Tribulus</i> , <i>Tribulus terrestris</i> , Zygophyllaceae, <i>Zygophyllum</i>                                                                                                                                                                                       |

**Supplementary Table 2.** Metadata of the pollen records used in the reconstructions.

| Latitude position | Entity name                            | Latitude | Longitude | Elevation | References                                                                                             |
|-------------------|----------------------------------------|----------|-----------|-----------|--------------------------------------------------------------------------------------------------------|
| 1                 | Kismohos                               | 48.33724 | 20.42333  | 315       | Willis et al (1997)                                                                                    |
| 2                 | Preluca                                | 47.8175  | 23.5358   | 730       | Feurdean (2005); Feurdean & Bennike (2004); Feurdean et al (2008)                                      |
| 3                 | Steregoiu                              | 47.813   | 23.5447   | 790       | Björkman et al. (2003); Feurdean & Bennike (2004); Feurdean et al (2008)                               |
| 4                 | Iaz Core                               | 47.10833 | 22.66111  | 300       | Grindean et al. (2014)                                                                                 |
| 5                 | Kardashinski Swamp                     | 46.51667 | 32.61667  | 4         | Kremenetski (1995)                                                                                     |
| 6                 | Capatana core                          | 46.46611 | 23.13639  | 1220      | Farcas et al. (2003)                                                                                   |
| 7                 | Mohos1                                 | 46.083   | 25.9167   | 1050      | Tantau (2003); Tantau et al. (2003)                                                                    |
| 8                 | Avrig 1                                | 45.716   | 24.383    | 400       | Tantau (2003); Tantau et al. (2006)                                                                    |
| 9                 | Pesteana peat bog                      | 45.5433  | 22.8061   | 480       | Farcas & Tantau (2012)                                                                                 |
| 10                | Taul Zanogutii core                    | 45.32778 | 22.80278  | 1840      | Farcas et al. (1999)                                                                                   |
| 11                | Semenic 1                              | 45.18    | 22.0594   | 1400      | Roesch & Fischer (2000)                                                                                |
| 12                | Chernaya NG-2                          | 44.57    | 33.6      | 2         | Cordova & Lehman (2005)                                                                                |
| 13                | Yaila                                  | 44.49    | 34.06     | 1205      | Cordova & Lehman (2003); Cordova & Lehman (2005)                                                       |
| 14                | Lake Srebarna<br>Lazarova94 Core       | 44.10914 | 27.06915  | 20        | Lazarova (1995)                                                                                        |
| 15                | Mire Garvan<br>Lazarova94 Core         | 44.10825 | 26.98818  | 20        | Lazarova (1995)                                                                                        |
| 16                | Luganskoe                              | 43.72    | 40.68     | 2428      | Kvavadze et al. (1994)                                                                                 |
| 17                | Quartzevoe                             | 43.67    | 41.17     | 2726      | Kvavadze & Efremov (1996)                                                                              |
| 18                | Serni Core                             | 43.66667 | 40.480556 | 2485      | Kvavadze & Efremov (1994)                                                                              |
| 19                | Lake Durankulak 3                      | 43.66667 | 28.55     | 4         | Marinova (2003)                                                                                        |
| 20                | Adange core 1                          | 43.31    | 41.33     | 1750      | Kvavadze & Rukhadze (1989)                                                                             |
| 21                | Amtkel core 1                          | 43.27    | 41.31     | 1830      | Kvavadze & Rukhadze (1989)                                                                             |
| 22                | Sibista                                | 43.23333 | 41.43056  | 2160      | Kvavadze & Rukhadze (1989)                                                                             |
| 23                | Lake Varna - 3                         | 43.2     | 27.83333  | 0         | Filipova-Marinova et al. (2014)                                                                        |
| 24                | Khodzal Kvavadze89<br>Core             | 42.95417 | 41.91111  | 2030      | Kvavadze & Rukhadze (1989)                                                                             |
| 24                | Khodzal Kvavadze89<br>Core             | 42.95417 | 41.91111  | 2030      | Kvavadze & Rukhadze (1989)                                                                             |
| 25                | Sredna Gora<br>Mountains               | 42.83333 | 24.83333  | 1300      | Filipovitch (1977); Filipovitch (1992);<br>Filipovitch et al. (1998); Petrov and<br>Filipovitch (1987) |
| 26                | Straldza                               | 42.6308  | 26.7728   | 137       | Tonkov et al. (2008); Tonkov et al. (2009)                                                             |
| 27                | Straldzha mire CANAL                   | 42.6308  | 26.7728   | 137       | Connor et al. (2013)                                                                                   |
| 28                | Kumata Core                            | 42.59028 | 23.25167  | 1770      | Tonkov & Possnert (2016)                                                                               |
| 29                | Vitosha Mountain<br>Filipovitch81 Core | 42.56809 | 23.26895  | 2000      | Filipovitch (1975); Filipovitch (1985)                                                                 |
| 30                | Beg Bunar peat bog                     | 42.1525  | 22.535    | 1750      | Lazarova et al. (2009)                                                                                 |
| 31                | Dry Lake 2                             | 42.038   | 23.533    | 1900      | Bozilova & Smit (1979); Bozilova et al.<br>(1986)                                                      |
| 32                | Kupena-3                               | 41.98333 | 24.3333   | 1356      | Tonkov et al. (2013); Tonkov et al. (2014)                                                             |
| 33                | Besbog-2 Stefanova87                   | 41.75    | 23.66667  | 2240      | Stefanova et al. (2006)                                                                                |
| 34                | Popovo Ezero<br>Stefanova86            | 41.71667 | 23.66667  | 2185      | Stefanova & Bozilova (1995)                                                                            |
| 35                | Didachara core                         | 41.68389 | 42.49694  | 2000      | Connor et al. (2017)                                                                                   |
| 36                | Imera core 1                           | 41.65    | 44.22     | 1610      | Connor & Sagona (2007); Connor et al.<br>(2004)                                                        |
| 37                | Aligol core 1                          | 41.63    | 44.02     | 1550      | Connor & Sagona (2007); Connor et al.<br>(2004)                                                        |

|    |                              |          |           |         |                                                             |
|----|------------------------------|----------|-----------|---------|-------------------------------------------------------------|
| 38 | Lake Blatisto                | 41.62139 | 24.67806  | 1540    | van Huis et al. (2013a); van Huis et al. (2013b)            |
| 39 | Kumisi core 1                | 41.58    | 44.83     | 469     | Connor et al (2004)                                         |
| 40 | Sakhare core 1               | 41.58    | 45.32     | 800     | Connor et al (2004)                                         |
| 41 | Mutorog Bozilova93 Core      | 41.52432 | 23.61661  | 1700    | Panovska et al. (1995)                                      |
| 42 | Elatia-Rhodopes              | 41.47972 | 24.32583  | 1520    | Athnasiadis et al. (1993)                                   |
| 42 | Elatia-Rhodopes              | 41.47972 | 24.32583  | 1520    | Gerasimidis & Athnasiadis (1995)                            |
| 43 | Beles Mountain               | 41.31944 | 23.01611  | 1400    | Athnasiadis et al. (2003)                                   |
| 44 | Lailias_core                 | 41.26778 | 23.59944  | 1420    | Gerasimidis (2000); Gerasimidis & Athnasiadis (1995)        |
| 45 | Paiko                        | 41.05167 | 22.27472  | 1080    | Gerasimidis & Athnasiadis (1995); Gerasimidis et al. (2008) |
| 46 | Voras                        | 41.0179  | 21.9122   | 1640    | Gerasimidis & Athnasiadis (1995); Gerasimidis et al. (2009) |
| 47 | Lake Ohrid                   | 40.938   | 20.759    | 693     | Wagner et al. (2009)                                        |
| 48 | Edessa1                      | 40.81806 | 21.9525   | 350     | Bottema (1974)                                              |
| 49 | Vegoritits 8 Bottema Core    | 40.75    | 21.75     | 570     | Bottema (1982)                                              |
| 50 | Sapanca long core SA03R6     | 40.71806 | 30.25833  | 30      | Leroy et al. (2010)                                         |
| 51 | Khimaditis lb Bottema65 Core | 40.61667 | 21.58333  | 560     | Bottema (1974)                                              |
| 52 | Orestias G25                 | 40.5117  | 21.2578   | 630     | Kouli & Dermitzakis (2010)                                  |
| 53 | Kaz Gölü                     | 40.28333 | 36.15     |         | Bottema et al. (1993)                                       |
| 54 | Flambouro mire               | 40.25944 | 22.17083  | 1645    | Gerasimidis & Athnasiadis (1995)                            |
| 54 | Flambouro mire               | 40.25944 | 22.17083  | 1645    | Gerasimidis & Panajiotidis (2010)                           |
| 55 | Litochoro_core               | 40.13889 | 22.54611  | 25      | Athnasiadis (1975)                                          |
| 56 | Rezina                       | 39.98778 | 20.77556  | 1760    | Willis (1992)                                               |
| 57 | Demiryurt Gölü Bottema Core  | 39.73333 | 37.383333 |         | Bottema et al. (1993)                                       |
| 58 | Pertouli core                | 39.52417 | 21.4775   | 1440    | Athnasiadis (1975)                                          |
| 59 | Trikhonis 5 Bottema Core     | 38.6     | 21.5      | 20      | Bottema(1982)                                               |
| 60 | Lake Almalou                 | 37.66528 | 46.63194  | 2410    | Djamali et al. (2009); Djamali et al. (2010)                |
| 61 | Lake Lerna                   | 37.58083 | 22.73     | 0       | Jahns (1993)                                                |
| 62 | HCGA05-core                  | 37.46944 | 47.3525   | -27     | Leroy et al. (2011); Amini et al. (2012)                    |
| 63 | Köycegiz Gölü Bottema70 Core | 36.875   | 28.641667 | 1491.76 | Bottema & Woldring (1984)                                   |
| 64 | EIG                          | 36.55    | 51.4833   | 550     | Ramezani et al. (2013)                                      |
| 65 | Asi Gonia 1                  | 35.24861 | 24.27778  | 780     | Atherden & Hall (1999)                                      |
| 66 | Asi Gonia 2                  | 35.24861 | 24.2778   | 780     | Atherden & Hall (1999)                                      |
| 67 | Bouara Bottema84 core        | 35.23333 | 41.18333  |         | Gremmen & Bottema (1991)                                    |
| 68 | Chamsine                     | 33.75278 | 35.948056 | 856     | Hajar et al. (2010); Cheddadi & Khater (2016)               |
| 69 | Wadi Shallalah               | 32.6     | 35.9      | 385     | Cordova (2007)                                              |
| 70 | Dead Sea DS7-1SC core        | 31.493   | 35.4361   | -402    | Leroy (2010)                                                |
| 71 | Ein Gedi                     | 31.46528 | 35.39417  | -413    | Litt et al. (2012)                                          |

### References for pollen records

Amini, A., Harami, R.M., Lahijani, H., and Mahboubi, A.(2012) Holocene sedimentation rate in Gorgan Bay and adjacent coast in Southeast of Caspian Sea. *Journal of Basic and Applied Scientific Research* 2: 289-297.

- Athanasiadis, N. (1975) Zur postglazialen Vegetationsentwicklung von Litochoro Katerinis und Pertouli Trikalon (Griechenland). *Flora* 164: 99-132.
- Athanasiadis, N., Gerasimidis, A., and Panajiotidis, S. (2003) A palynological study in the Beles Mountains, Northern Greece. In: *Aspects of Palynology and Palaeoecology. Festschrift in Honour of Elissaveta Bozilova*, pp. 185-197. PENSOFT, Sofia-Moscow.
- Athanasiadis, N., Gerasimidis, A., Eleftheriadou, E., and Theodoropoulos, K. (1993) Zur postglazialen Vegetationsentwicklung des Rhodopi-Gebirges (Elatia Dramas - Griechenland). *Dissertationes botanicae*, 196: 427-437.
- Atherden, M.A., and Hall, J.A. (1999) Human impact on vegetation in the White Mountains of Crete since AD 500. *The Holocene*, 9:183-193.
- Björkman, L., Feurdean, A., and Wohlfarth, B., (2003) Late-Glacial and Holocene forest dynamics at Steregoiu in the Gutaiului Mountains, Northwest Romania. *Review of Palaeobotany and Palynology* 124: 79-111.
- Bottema, S. (1974) Late Quaternary Vegetation History of Northwestern Greece. Ph.D. Dissertation. University of Groningen, Groningen, The Netherlands
- Bottema, S., (1982) Palynological investigations in Greece with special reference to pollen as indicator of human activity. *Palaeohistoria*, 24: 257-289.
- Bottema, S., and Woldring, H. (1984) Late Quaternary vegetation and climate of southwestern Turkey. Part II. *Palaeohistoria* 26: 123-149.
- Bottema, S., Woldring, H. and Aytug, B. (1993) Late Quaternary vegetation history of northern Turkey. *Palaeohistoria* 35/36: 13-72
- Bozilova, E., and Smit, A.G. (1979) Palynology of lake Sucho Ezero from South Rila Mountain (Bulgaria). *Phytologia* 11: 54-67.
- Bozilova, E., Tonkov, S., and Pavlova, D. (1986) Pollen and plant macrofossil analyses of the Lake Sucho Ezero in the south Rila mountains. *Annual Journal of Sofia University, Faculty of Biology* 80: 48-57.
- Cheddadi, R., and Khater, C. (2016) Climate change since the last glacial period in Lebanon and the persistence of Mediterranean species. *Quaternary Science Reviews* 150: 146-157.
- Connor, S.E., and Sagona, A. (2007) Environment and society in the late prehistory of southern Georgia, Caucasus. In B. Lyonnet (ed.) *Les cultures du Caucase (VI-IIIème millénaires av. notre ère). Leurs relations avec le Proche-Orient Ancien*, Peeters Press, pp. 21-26.
- Connor, S.E., D. Colombaroli, F. Confortini, E. Gobet, B.P. Ilyashuk, E.A. Ilyashuk, J.F.N. van Leeuwen, M. Lamentowicz, W.O. van der Knaap, E. Malysheva, A. Marchetto, N. Margalitzadze, Y. Mazei, E.A.D. Mitchell, R.J. Payne, and B. Ammann (2017) Long-term population dynamics – theory and reality in a peatland ecosystem. *Journal of Ecology* DOI: 10.1111/1365-2745.12865
- Connor, S.E., Ross, S.A., Sobotkova, A., Herries, A.I.R., Mooney, S.D., Longford, C. and Iliev, I. (2013) Environmental conditions in the SE Balkans since the Last Glacial Maximum and their influence on the spread of agriculture into Europe. *Quaternary Science Reviews*, 68: 200-215.
- Connor, S.E., Thomas, I., Kvavadze, E.V., Arabuli, G.J., Avakov, G.S., & Sagona, A. (2004) A survey of modern pollen and vegetation along an altitudinal transect in southern Georgia, Caucasus region. *Review of Palaeobotany and Palynology* 129: 229-250.
- Cordova, C.E. (2007). *Millennial Landscape Change in Jordan: Geoarchaeology and Cultural Ecology*. Tucson: University of Arizona Press 272 p.
- Cordova, C.E., and Lehman, P.H. (2003) Archaeopalynology of synanthropic vegetation in the chora of Chersonesos, Crimea, Ukraine. *Journal of Archaeological Science* 30:1483-1501.
- Cordova, C.E., and Lehman, P.H. (2005) Holocene environmental change in southwestern Crimea (Ukraine) in pollen and soil records. *The Holocene* 15:263-277.
- Djamali, M., de Beaulieu, J.L., Andrieu-Ponel, V., Berberian, M., Miller, N.F., Gandouin, E., Lahijani, H.A.K., Shah-Hosseini, M., Ponel, P., Salimian, M., and Guiter, F. (2009) A late Holocene pollen record from Lake Almalou in NW Iran: evidence for changing land-use in relation to some historical events during the last 3700 years. *Journal of Archaeological Science*, 36: 1363-1375.

- Djamali, M., Miller, N.F., Ramezani, E., Andrieu-Ponel, V., de Beaulieu, J.L., Berberian, M., Guibal, F., Lahijani, H.A.K., Lak, R., and Ponel, P. (2010) Notes on arboricultural and agricultural practices in Ancient Iran based on new pollen evidence. *Paléorient* 36: 175-188.
- Farcas, S., and Tantau, I. (2012) Contribution to the European Pollen Database. 16. Poiana Rusca Mountains (Romania): Pesteana peat bog. *Grana* 51: 249-251.
- Farcas, S., de Beaulieu, J.L., Reille, M., Coldea, G., Diaconeasa, B., Goeury, C., Goslar, T., and Jull, T. (1999) First <sup>14</sup>C dating of Late Glacial and Holocene pollen sequences from Romanian Carpathes. *Compte Rendu de l'Académie des Sciences Paris, Série III, Sciences de la Vie* 322: 799-807.
- Farcas, S., Lupsa, V., Tantau, I., and Bodnariuc, A. (2003) Reflectarea procesului de antropizare in diagramele sporo-polinice din Muntii Apuseni. In: *Environment and Progress*, Cluj-Napoca, pp. 231-236.
- Feurdean, A. (2005) Holocene forest dynamics in northwestern Romania. *The Holocene* 15: 435-446.
- Feurdean, A., and Bennike, O. (2004) Late Quaternary palaeoecological and palaeoclimatological reconstruction in the Gutaiului Mountains, northwest Romania. *Journal of Quaternary Science* 19: 808-827.
- Feurdean, A., Klotz, S., Mosbrugger, V., and Wohlfarth, B. (2008) Pollen-based quantitative reconstructions of Holocene climate variability in NW Romania. *Palaeogeography, Palaeoclimatology, Palaeoecology* 260: 494-504.
- Filipova-Marinova M., Pavlov, D., Vergiev, S., Slavchev, V., and Giosan, L. (2014) Contributions to the European Pollen Database. 24. Varna Lake (north-eastern Bulgaria): vegetation history and human impact during the last 8000 years. *Grana* 53: 309-311.
- Filipovitch, L. (1975) Vegetation history of the high parts of Vitosha mountain during the Late Postglacial times. *Fitologija* 34: 3-27
- Filipovitch, L. (1977). Palynological data for the postglacial distribution of Juglans in the composition of Bulgarian flora. *Phytology* 6: 32-37.
- Filipovitch, L. (1985) Palynological studies of peat bogs on the southern slopes of Vitosha mountain. *Forest Science* 2: 3-16.
- Filipovitch, L. (1992) Anthropogenic activity as a factor for the formation of contemporary plant communities in the central Sredna Gora mountain. *Fitologija* 43: 30-35.
- Filipovitch, L., Lazarova, M., Stefanova, I., and Petrova, M. (1998) Development of vegetation in Mt Sredna Gora during the Holocene. *Phytologia Balcanica* 4: 13-29.
- Gerasimidis, A. (2000) Palynological evidence for human influence on the vegetation of mountain regions in northern Greece: the case of Lailias, Serres. *Sheffield Studies in Aegian Archaeology*. Sheffield Academic Press, Sheffield England.
- Gerasimidis, A., and Athanasiadis, N. (1995) Woodland history of northern Greece from the mid Holocene to recent time based on evidence from peat pollen profiles. *Vegetation History and Archaeobotany* 4:109-116.
- Gerasimidis, A., and Panajiotidis, S. (2010) Contributions to the European Pollen Database. 9. Flambouro, Pieria Mountains (northern Greece). *Grana* 49: 76-78
- Gerasimidis, A., Athanasiadis, N., and Panajiotidis, S. (2008) Contributions to the European Pollen Database. 4. Mount Paiko (northern Greece). *Grana* 47: 316-318.
- Gerasimidis, A., Athanasiadis, N., and Panajiotidis, S. (2009) Contributions to the European Pollen Database. 8. Mount Voras (north-west Greece). *Grana* 48: 316-318.
- Gremmen, W.H.E., and Bottema, S. (1991). Palynological investigations in the Syrian Gazira. In H. Kühne (Ed.), *Die rezente Umwelt von Tall Seh Hamad und Daten zur Umweltrekonstruktion der assyrischen Stadt Dur-Katlimmu*. Dietrich Reimer Verlag, Berlin, Germany, pp 105-116.
- Grindean, R., Tantau, I., Farcas, S., and Panait, A. (2014) Middle to Late Holocene vegetation shifts in the NW Transylvanian lowlands (Romania). *Studia UBB Geologia* 59: 29-37.
- Hajar, L., Haïdar-Boustani, M., Khater, C., and Cheddadi, R. (2010) Environmental changes in Lebanon during the Holocene: Man vs. climate impacts. *Journal of Arid Environments* 74: 746-755.
- Jahns, S. (1993) On the Holocene vegetation history of the Argive plain (Peloponnese, southern Greece). *Vegetation History and Archaeobotany* 2: 187-203.



- Kouli, K., and Dermitzakis, M.D. (2010) Contributions to the European Pollen Database. 11. Lake Orestias (Kastoria, northern Greece). *Grana* 49:154-156.
- Kremenetski, C. (1995) Holocene vegetation and climate history of southwestern Ukraine. *Review of Paleobotany and Palynology* 85: 289-301
- Kvavadze, E.V., and Efremov, Y.V. (1994) Palynological studies of Holocene lake sediments in the headwaters of the river Bezymianka (West Caucasus). *Acta Palaeobotanica* 34: 205-214.
- Kvavadze, E. V, and Efremov, Y.V. (1996): Palynological studies of lake and lake-swamp sediments of the Holocene in the high mountains of Arkhys (Western Caucasus). *Acta Palaeobotanica* 36: 107-119.
- Kvavadze, E.V., and Rukhadze, L.I. (1989). *Rastitel'nost' i klimat golotsena Abkhazii (Vegetation and climate of the Holocene in Abkhazia)*. Metsniereba, Tbilisi, 137pp
- Kvavadze, E.V., Efremov, Y.V., Bukreeva, G.V., and Akatov, V.V. (1994) Palynological characteristic of the series of lacustrine and paludal deposits of the Holocene in the headwaters of the Zakan river (Western Caucasus). *Bulletin of the Georgian Academy of Sciences* 150: 177-184.
- Lazarova, M.A. (1995): Human impact on the natural vegetation in the region of Lake Srebarna and mire Garvan (northeastern Bulgaria). Palynological and palaeoethnobotanical evidence. In: E. Bozilova and Tonkov, S. (Eds.). *Advances in Holocene Palaeoecology in Bulgaria*, pp. 47-67
- Lazarova, M.A., Tonkov, S., Snowball, I., and Marinova, E. (2009) Contribution to the European Pollen Database. 6. Peat-bog Begubar (Osogovo Mountains, south-west Bulgaria): Four millenia of vegetation history. *Grana* 48: 147-149.
- Leroy, S.A.G. (2010) Pollen analysis of core DS7-1SC (Dead Sea) showing intertwined effects of climatic change and human activities in the Late Holocene. *Journal of Archaeological Science* 37: 306-316.
- Leroy, S.A.G., Lahijani, H.A.K., Djamali, M., Naqinezhad, A., Moghadam, M.V., Arpe, K., Shah-Hosseini, M., Hosseindoust, M., Miller, C.S., Tavakoli, V., Habibi, P., Naderi Beni. M. (2011) Late Little Ice Age palaeoenvironmental records from the Anzali and Amirkola Lagoons (south Caspian Sea): Vegetation and sea level changes. *Palaeogeography, Palaeoclimatology, Palaeoecology* 302:415-434.
- Leroy, S.A.G., Schwab, M.J., Costa, P.J.M. (2010) Seismic influence on the last 1500-year infill history of Lake Sapanca (North Anatolian Fault, NW Turkey). *Tectonophysics* 486: 15-27
- Litt, T., Ohlwein, C., Neumann, F.H., Hense, A., Stein, M. (2012): Holocene climate variability in the Levant from the Dead Sea pollen record. *Quaternary Science Reviews* 49: 95-105.
- Marinova, E. (2003) The new pollen core Lake Durankulak-3: a contribution to the vegetation history and human impact in Northeastern Bulgaria. In Tonkov, S. (Ed.) *Aspects of Palynology and Palaeoecology: Festschrift in Honour of Elissaveta Bozilova*, pp. 279-288.
- Panovska, H., Bozilova, E., Tonkov, S. (1995) A palaeoecological investigation on the vegetation history in the Southern Pirin Mts. (SW. Bulgaria). In: *Advances in Holocene Palaeoecology in Bulgaria*. Bozilova, E. and Tonkov, S. (Eds.) Pensoft Publications, Sofia-Moscow, pp. 32-46.
- Ramezani, E., Marvie Mohadjer, M.R., Knapp, H.D., Theuerkauf, M., Manthey, M., and Joosten, H. (2013) Pollen-vegetation relationships in the central Caspian (Hyrcanian) forests of northern Iran. *Review of Palaeobotany and Palynology* 189: 38-49.
- Roesch, M., and Fischer, E. (2000) A radiocarbon dated Holocene pollen profile from the Banat mountains (Southwestern Carpathians, Romania). *Flora* 195: 277-286.
- Stefanova, I., Bozilova, E. (1995) Studies on the Holocene history of vegetation in the Northern Pirin Mts., southwestern Bulgaria. In: *Advances in Holocene Palaeoecology in Bulgaria*, Bozilova, E. and Tonkov, S. (Eds.) Pensoft Publications, Sofia-Moscow, 9-31.
- Stefanova, I., Atanassova, J., Delcheva, M., Wright, H.E. (2006) Chronological framework for the Lateglacial pollen and macrofossil sequence in the Pirin Mountains, Bulgaria: Lake Besbog and Lake Kremensko-5. *The Holocene* 16: 877-892.
- Tantau, I. (2003) Pollen Analytic Researches in the Eastern Romanian Carpathians. History of Vegetation and Human Impact. PhD thesis Aix-Marseille III University and Babes-Bolyai of Cluj-Napoca University.
- Tantau, I., Reille, M., De Beaulieu, J.-L., Farcas, S., Goslar, T., and Paterne, M. (2003) Vegetation history in the Eastern Romanian Carpathians: pollen analysis of the two sequences from the Mohos crater. *Vegetation History and Archaeobotany* 12: 113-125.

- Tantau, I., Reille, M., De Beaulieu, J.-L., and Farcas, S. (2006) Late Glacial and Holocene vegetation history in the southern part of Transylvania (Romania): pollen analysis of two sequences from Avrig. *Journal of Quaternary Science* 21: 49-61.
- Tonkov, S., and Possnert, G. (2016) Contributions to the European Pollen Database. 30. Peat bog Kumata-1, Vitosha Mountain (Bulgaria). *Grana* 55: 250-252.
- Tonkov, S., Bozilova, E., Marinova, E., and Jungner, H. (2008) History of vegetation and landscape during the last 4000 years in the area of Straldzha mire (southeastern Bulgaria). *Phytologia Balcanica* 14: 185-191.
- Tonkov, S., Bozilova, E., and Jungner, H. (2009) Contributions to the European Pollen Database. 7. Mire Staldza (Southeastern Bulgaria): Late Holocene vegetation history. *Grana* 48: 235-237.
- Tonkov, S., Lazarova, M.A., Bozilova, E., Ivanov, D., and Snowball, I. (2013) Contributions to the European Pollen Database. 19. Mire Kupena, Western Rhodopes Mountains (South Bulgaria). *Grana* 52: 238-240.
- Tonkov, S., Lazarova, M.A., Bozilova, E., Ivanov, D., and Snowball, I. (2014) A 30,000-year pollen record from Mire Kupena, Western Rhodopes Mountains (south Bulgaria). *Review of Palaeobotany and Palynology* 209: 41-51.
- van Huis, J., Tonkov, S., and Bozilova, E. (2013a). Contributions to the European Pollen Database. 18. Lake Blatisto, Rhodopes Mountains (South Bulgaria). *Grana* 52:78-80.
- van Huis, J., Tonkov, S., and Bozilova, E. (2013b) Two millennia of vegetation history in the Smolyan lake area, Central Rhodopes Mountains (Bulgaria). *Phytologia Balcanica* 19: 169-178.
- Wagner, B., Lotter, A.F., Nowaczyk, N.R., Reed, J.M., Schwalb, A., Sulpizio, R., Valsecchi, V., Wessels, M., and Zanchetta, G. (2009): A 40,000-year record of environmental change from ancient Lake Ohrid (Albania and Macedonia). *Journal of Paleolimnology*, 41, 407-430.
- Willis, K.J. (1992) The late Quaternary vegetational history of northwest Greece. II. Rezina marsh. *New Phytologist* 121: 119-138.
- Willis, K.J., Braun, M., Sumegi, P., and Toth, A. (1997) Does soil change cause vegetation change or vice versa? A temporal perspective from Hungary. *Ecology* 73: 740-750.

**Supplementary Table 3.** Details of the models used for the transient climate simulations.

| Model                                                 | Model code   | Time frame (yr BP) | Horizontal resolution (lat x long) | Vegetation | References                                                               |
|-------------------------------------------------------|--------------|--------------------|------------------------------------|------------|--------------------------------------------------------------------------|
| Institut Pierre Simon Laplace Earth System Model      | IPSL-CMIP5   | 6000-0             | 1.875 x 3.75                       | prescribed | Dufresne et al., 2013; Sepulcre et al., 2020; Braconnot et al., 2019a, b |
| Institut Pierre Simon Laplace Earth System Model      | IPSL-CMIP5   | 6000-0             | 1.25 x 2.5                         | dynamic    | Dufresne et al., 2013; Braconnot et al., 2019a, b                        |
| Max Planck Institute Earth System Model version 1.2   | MPI          | 7950-100           | T63                                | dynamic    | Bader et al., 2020; Dallmeyer et al., 2021                               |
| Alfred Wegener Institute Earth System Model version 2 | AWI          | 6000-0             | T63                                | dynamic    | Sidorenko et al., 2019; Lamping et al., 2021; Shi et al., 2022           |
| LOVECLIM                                              | LOVECLIM     | 11500-0            | T21                                | dynamic    | Goosse et al., 2010; Zhang et al., 2016                                  |
| Community Climate System Model, version 3             | TRACE-21k-I  | 22000-0            | T31                                | dynamic    | Collins et al., 2006; Otto-Bleisner et al., 2006; Liu et al., 2009       |
| Community Climate System Model, version 3             | TRACE-21k-II | 22000-0            | T31                                | dynamic    | He and Clark, 2022                                                       |

**References for model simulations**

- Bader, J., Jungclaus, J., Krivova, N., Lorenz, S., Maycock, A., Raddatz, T., Schmidt, H., Toohey, M., Wu, C.-J., and Claussen, M.: Global temperature modes shed light on the Holocene temperature conundrum. *Nat. Commun.* 11, 4726, <https://doi.org/10.1038/s41467-020-18478-6>, 2020.
- Braconnot, P., Cretat, J., Marti, O., Balkanski, Y., Caubel, A., Cozic, A., Foujols, M.-A., and Sanogo, S.: Impact of multiscale variability on last 6,000 Years Indian and West african monsoon rain. *Geophys. Res. Lett.* 46, 14021e14029, <https://doi.org/10.1029/2019GL084797>, 2019a.
- Braconnot, P., Zhu, D., Marti, O., and Servonnat, J.: Strengths and challenges for transient Mid- to Late Holocene simulations with dynamical vegetation. *Clim. Past* 15, 997e1024, 2019b.
- Dallmeyer, A., Claussen, M., Lorenz, S.J., and Shanahan, T.: The end of the African humid period as seen by a transient comprehensive Earth system model simulation of the last 8000-years. *Clim. Past*, 16, 117–140, <https://doi.org/10.5194/cp-16-117-2020>, 2020.
- Dufresne, J.-L., Foujols, M.-A., Denvil, S., Caubel, A., Marti, O., Aumont, O., Balkanski, Y., Bekki, S., Bellenger, H., Benschila, R., Bony, S., Bopp, L., Braconnot, P., Brockmann, P., Cadule, P., Cheruy, F., Codron, F., Cozic, A., Cugnet, D., de Noblet, N., Duvel, J.-P., Ethe, C., Fairhead, L., Fichet, T., Flavoni, S., Friedlingstein, P., Grandpeix, J.-Y., Guez, L., Guilyardi, E., Hauglustaine, D., Hourdin, F., Idelkadi, A., Ghattas, J., Jousaume, S., Kageyama, M., Krinner, G., Labetoulle, S., Lahellec, A., Lefebvre, M.-P., Lefevre, F., Levy, C., Li, Z.X., Lloyd, J., Lott, F., Madec, G., Mancip, M., Marchand, M., Masson, S., Meurdesoif, Y., Mignot, J., Musat, I., Parouty, S., Polcher, J., Rio, C., Schulz, M., Swingedouw, D., Szopa, S., Talandier, C., Terray, P., Viovy, N., and Vuichard, N.: Climate change projections using the IPSL-CM5 earth system model: from CMIP3 to CMIP5. *Clim. Dynam.* 40, 2123e2165, <https://doi.org/10.1007/s00382-012-1636-1>, 2013.
- Goosse, H., Brovkin, V., Fichet, T., Haarsma, R., Huybrechts, P., Jongma, J., Mouchet, A., Selten, F., Barriat, P.-Y., Campin, J.-M., Deleersnijder, E., Driesschaert, E., Goelzer, H., Janssens, I., Loutre, M.-F., Morales Maqueda, M. A., Opsteegh, T., Mathieu, P.-P., Munhoven, G., Pettersson, E. J., Renssen, H., Roche, D. M., Schaeffer, M., Tartinville, B., Timmermann, A., and Weber, S. L.: Description of the Earth system model of intermediate complexity LOVECLIM version 1.2, *Geosci. Model Dev.*, 3, 603–633, <https://doi.org/10.5194/gmd-3-603-2010>, 2010.

- He, F., and Clark, P.U.: Freshwater forcing of the Atlantic Meridional Overturning Circulation revisited. *Nat. Clim. Change*, 12, 449-454, <https://doi.org/10.1038/s41558-022-01328-2>, 2022
- Lamping, N., Müller, J., Hefter, J., Mollenhauer, G., Haas, C., Shi, X., Vorrath, M.-E., Lohmann, G., and Hillenbrand, C.-D.: Evaluation of lipid biomarkers as proxies for sea ice and ocean temperatures along the Antarctic continental margin. *Clim. Past*, 17, 2305–2326, <https://doi.org/10.5194/cp-17-2305-2021>, 2021.
- Liu, Z., Otto-Bliesner, B. L., He, F., Brady, E. C., Tomas, R., Clark, P. U., Carlson, A. E., Lynch-Stieglitz, J., Curry, W., Brook, E., Erickson, D., Jacob, R., Kutzbach, J., and Cheng, J.: Transient Simulation of Last Deglaciation with a New Mechanism for Bolling-Allerod Warming. *Science*, 325, 310-314, doi:10.1126/science.1171041, 2009.
- Otto-Bliesner, B.L., Hewitt, C.D., Marchitto, T.M., Brady, E., Abe-Ouchi, A., Crucifix, M., Murakami, S., and Weber, S.L.: Last Glacial Maximum ocean thermohaline circulation: PMIP2 model intercomparisons and data constraints, *Geophys. Res. Lett.*, 34, L12706, doi:10.1029/2007GL029475, 2007
- Sepulchre, P., Caubel, A., Ladant, J.-B., Bopp, L., Boucher, O., Braconnot, P., Brockmann, P., Cozic, A., Donnadieu, Y., Dufresne, J.-L., Estella-Perez, V., Ethe, C., Fluteau, F., Foujols, M.-A., Gastineau, G., Ghattas, J., Hauglustaine, D., Hourdin, F., Kageyama, M., Khodri, M., Marti, O., Meurdesoif, Y., Mignot, J., Sarr, A.-C., Servonnat, J., Swingedouw, D., Szopa, S., and Tardif, D.: IPSL-CM5A2 e an Earth system model designed for multi-millennial climate simulations. *Geosci. Model Dev.*, 13, 3011e3053. <https://doi.org/10.5194/gmd-13-3011-2020>, 2020.
- Sidorenko, D., Goessling, H. f., von Koldunov, N., Scholz, P., Danilov, S., Barbi, D., Cabos, W., Gurses, O., Harig, S., Hinrichs, C., Juricke, S., Lohmann, G., Losch, M., Mu, L., Rackow, T., Rakowsky, N., Sein, D., Semmler, T., Shi, X., ... and Jung, T.: Evaluation of FESOM2.0 coupled to ECHAM6.3: Preindustrial and HighResMIP simulations. *J. Adv. Model. Earth Syst.*, 11, 3794–3815. <https://doi.org/10.1029/2019MS001696>, 2019.
- Zhang, Y., Renssen, H., and Seppä, H.: Effects of melting ice sheets and orbital forcing on the early Holocene warming in the extratropical Northern Hemisphere. *Clim. Past*, 12, 1119–1135. <https://doi.org/10.5194/cp-12-1119-2016>, 2016.

**Supplementary Table 4.** Leave-out cross-validation fitness of fxTWA-PLSv2 for mean temperature of the coldest month (MTCO), mean temperature of the warmest month (MTWA), growing degree days above base level 0°C (GDD0) and plant-available moisture ( $\alpha$ ) with p-spline smoothed fx estimation, using bins of 0.02, 0.02 and 0.002, showing results for all the components. RMSEP is the root-mean-square error of prediction. p assesses whether using the current number of components is significantly different from using one component less; the last significant number of components is indicated in bold. The degree of overall compression is assessed by linear regression of the cross-validated reconstructions onto the climate variable, where b1 and b1.se are the slope and the standard error of the slope, respectively. The overall compression is reduced as the slope approaches 1.

| Variable                   | Component | R2          | Average bias | Max absolute bias | Min absolute bias | RMSEP         | p            | b1          | b1.se       |
|----------------------------|-----------|-------------|--------------|-------------------|-------------------|---------------|--------------|-------------|-------------|
| MTCO                       | 1         | 0.67        | -0.41        | 19.78             | 0.00              | 4.08          | 0.001        | 0.82        | 0.01        |
| MTCO                       | 2         | 0.70        | -0.37        | 16.47             | 0.00              | 3.85          | 0.001        | 0.84        | 0.01        |
| MTCO                       | 3         | 0.72        | -0.20        | 22.75             | 0.00              | 3.72          | 0.001        | 0.86        | 0.01        |
| <b>MTCO</b>                | <b>4</b>  | <b>0.73</b> | <b>-0.22</b> | <b>26.35</b>      | <b>0.00</b>       | <b>3.67</b>   | <b>0.001</b> | <b>0.86</b> | <b>0.01</b> |
| MTCO                       | 5         | 0.73        | -0.22        | 30.22             | 0.00              | 3.70          | 0.948        | 0.87        | 0.01        |
| MTWA                       | 1         | 0.61        | -0.19        | 15.33             | 0.00              | 3.36          | 0.001        | 0.76        | 0.01        |
| <b>MTWA</b>                | <b>2</b>  | <b>0.63</b> | <b>-0.10</b> | <b>14.05</b>      | <b>0.00</b>       | <b>3.22</b>   | <b>0.001</b> | <b>0.78</b> | <b>0.01</b> |
| MTWA                       | 3         | 0.63        | -0.08        | 13.90             | 0.00              | 3.22          | 0.699        | 0.78        | 0.01        |
| MTWA                       | 4         | 0.64        | -0.13        | 15.07             | 0.00              | 3.20          | 0.027        | 0.78        | 0.01        |
| MTWA                       | 5         | 0.64        | -0.11        | 13.87             | 0.00              | 3.20          | 0.405        | 0.79        | 0.01        |
| GDD0                       | 1         | 0.67        | 67.56        | 3907.85           | 0.56              | 916.31        | 0.001        | 0.78        | 0.01        |
| <b>GDD0</b>                | <b>2</b>  | <b>0.69</b> | <b>56.46</b> | <b>3702.27</b>    | <b>0.24</b>       | <b>880.33</b> | <b>0.001</b> | <b>0.79</b> | <b>0.01</b> |
| GDD0                       | 3         | 0.70        | 57.82        | 3740.39           | 0.02              | 877.97        | 0.155        | 0.79        | 0.01        |
| GDD0                       | 4         | 0.70        | 34.31        | 4231.43           | 0.65              | 871.31        | 0.069        | 0.79        | 0.01        |
| GDD0                       | 5         | 0.70        | 36.70        | 4961.93           | 0.00              | 872.04        | 0.654        | 0.80        | 0.01        |
| $\alpha$                   | 1         | 0.71        | -0.01        | 0.64              | 0.00              | 0.16          | 0.001        | 0.79        | 0.01        |
| <b><math>\alpha</math></b> | <b>2</b>  | <b>0.73</b> | <b>-0.01</b> | <b>0.65</b>       | <b>0.00</b>       | <b>0.15</b>   | <b>0.001</b> | <b>0.80</b> | <b>0.01</b> |
| $\alpha$                   | 3         | 0.73        | -0.01        | 0.65              | 0.00              | 0.15          | 0.593        | 0.80        | 0.01        |
| $\alpha$                   | 4         | 0.74        | -0.01        | 0.65              | 0.00              | 0.15          | 0.001        | 0.82        | 0.01        |
| $\alpha$                   | 5         | 0.74        | -0.01        | 0.68              | 0.00              | 0.15          | 0.431        | 0.83        | 0.01        |

**Supplementary Figure 1.** Map of distribution of the modern pollen samples the SPECIAL Modern Pollen Data Set (SMPDS) (Harrison, 2019) used to train the model.

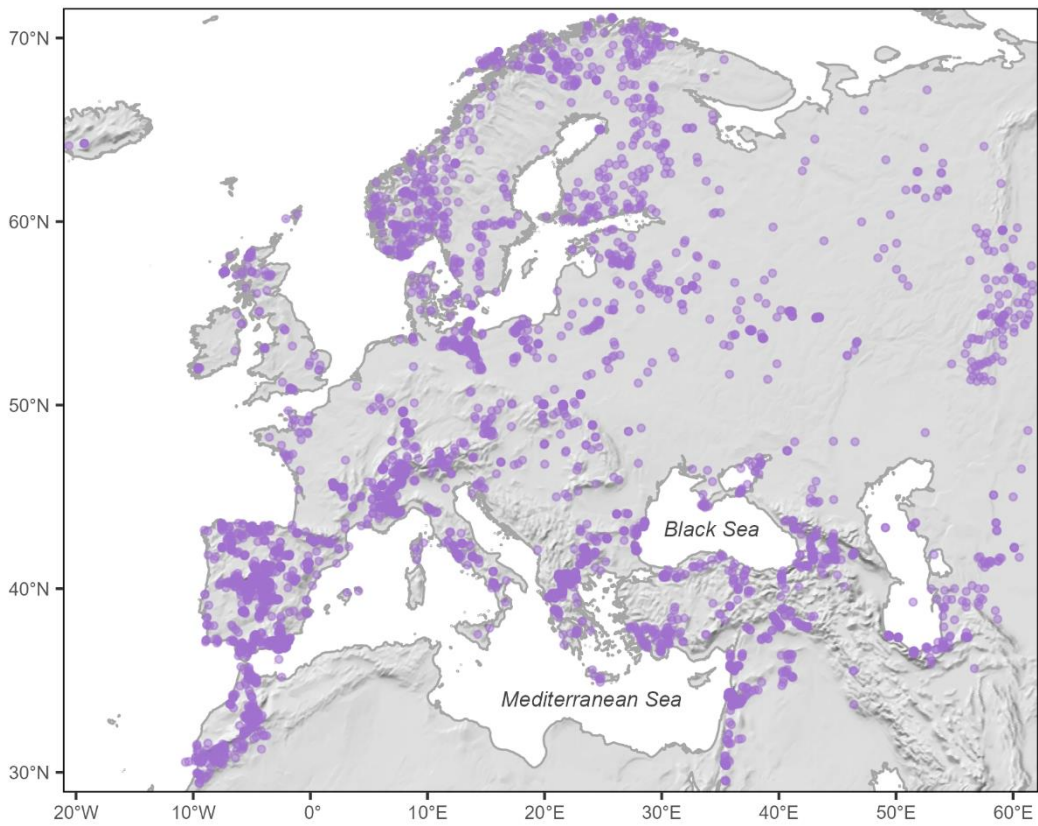

**Supplementary Figure 2.** Distribution of Hill N2 values of the fossil pollen samples. Samples with an N2 value of <2 (indicated by the red dotted line) were excluded from the analysis.

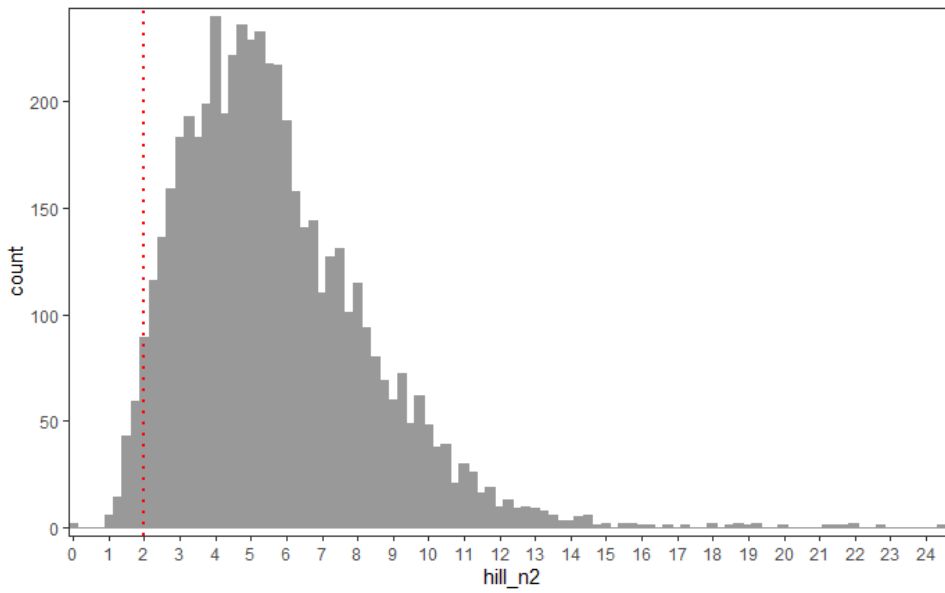

**Supplementary Figure 3.** Impact of correcting for the direct effect of changing CO2 levels following Prentice et al. (2022) on the reconstruction of  $\alpha$ . The original reconstruction is shown in green and the corrected reconstruction in red.

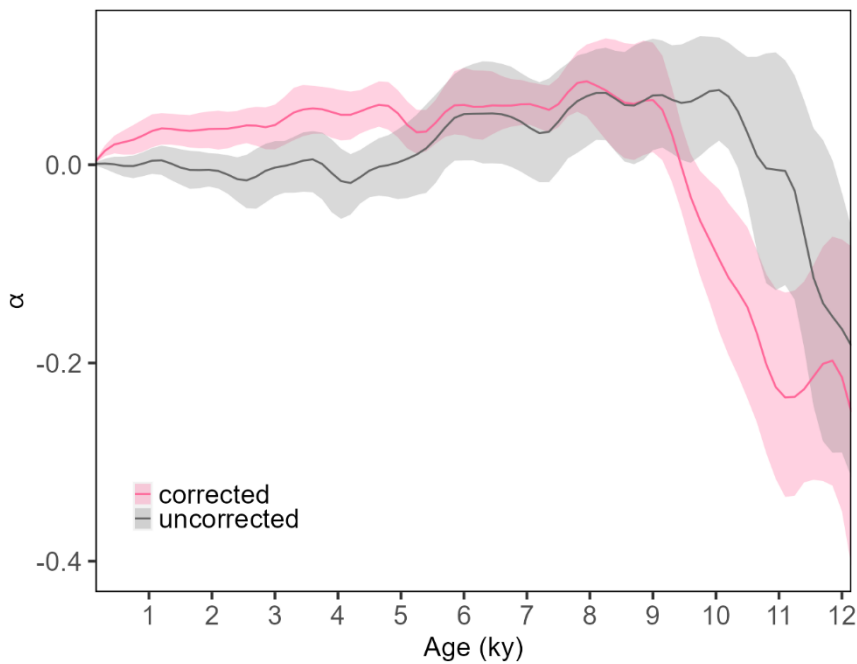

**Supplementary Figure 4.** Comparison of mean temperature of the coldest month (MTCO) and mean temperature of the warmest month (MTWA) in the EMBSeCBIO domain from the TRACE-21K-I simulation, showing both the calendar adjusted version (green) and non-calendar adjusted version (orange), and compared to the non-calendar adjusted outputs from the TRACE-21K-II (red) simulation.

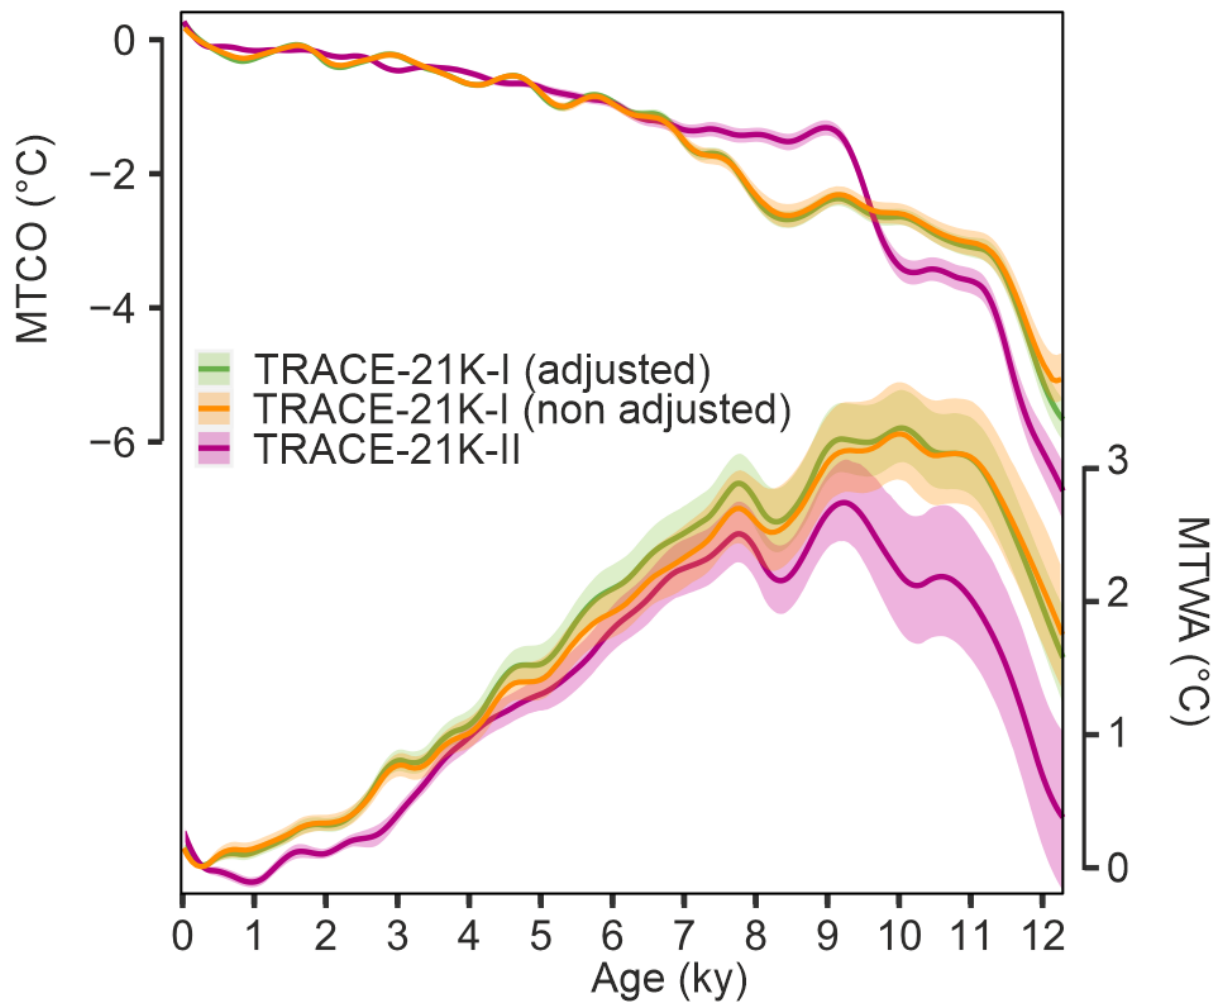



**Supplementary Figure 5.** Geopotential height, expressed as anomalies compared to present, from the LOVECLIM simulations for four key times during the Holocene:  $11 \pm 0.15$ ,  $9 \pm 0.15$ ,  $6 \pm 0.15$  and  $3 \pm 0.15$  ka.

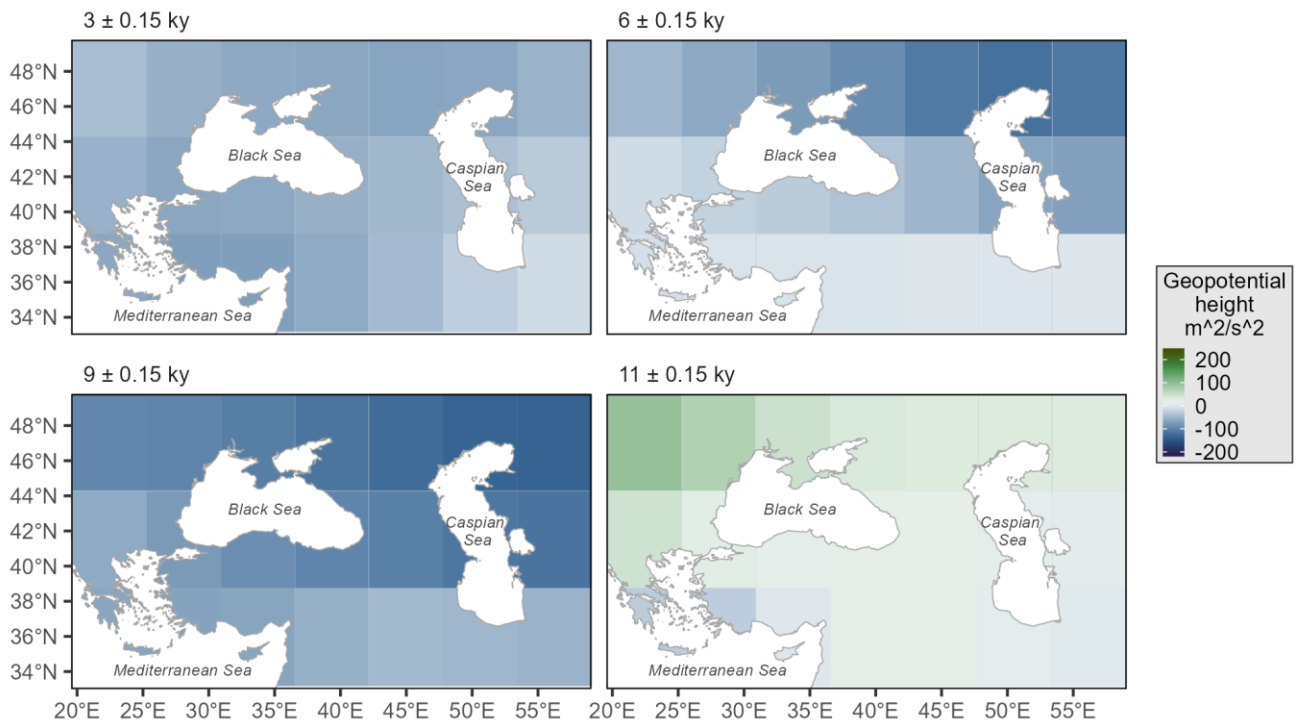

Supplement: Supplementary file 1 [file egusphere-2023-864-supplement.pdf]
